# Supplementary material
Source: ML conference proceedings conference paper supplement (https://openreview.net/forum?id=I01l7rc0jcb)
Supplement: supplementary_material [file attachment]

---

# Appendix

## Monash Time Series Forecasting Archive

---

**Rakshitha Godahewa**  
Monash University  
Melbourne, Australia  
rakshitha.godahewa@monash.edu

**Christoph Bergmeir**  
Monash University  
Melbourne, Australia  
christoph.bergmeir@monash.edu

**Geoffrey I. Webb**  
Monash University  
Melbourne, Australia  
geoff.webb@monash.edu

**Rob J. Hyndman**  
Monash University  
Melbourne, Australia  
rob.hyndman@monash.edu

**Pablo Montero-Manso**  
University of Sydney  
Australia  
pmontm@gmail.com

### 1 A Data records

2 Our archive contains 26 time series datasets. Out of them, 20 datasets contain multiple related  
3 time series to facilitate the evaluation of global time series forecasting models (Section A.6). The  
4 remaining 6 datasets contain single very long time series (Section A.7). As a large amount of data  
5 oftentimes renders machine learning methods feasible compared with traditional statistical modelling,  
6 and we are not aware of good and systematic benchmark data in this space either, these series are  
7 included in our repository as well.

### 8 A.1 Data collection procedure

9 All these datasets were already publicly available in different platforms with different data formats.  
10 Hence, we did not have to manually collect the observations. The original sources of all datasets are  
11 mentioned in the datasets descriptions (Sections A.6 and A.7). Out of the 26 datasets, 8 originate  
12 from competition platforms, 3 from a prior research conducted by Lai et al. [1], 6 are taken from R  
13 packages, 1 is from the Kaggle platform [2], and 1 is taken from a Johns Hopkins repository [3]. The  
14 other datasets have been extracted from corresponding domain specific platforms.

15 After extracting datasets, we analysed them individually to identify the datasets containing series  
16 with different frequencies and missing observations. Nine datasets contain time series belonging to  
17 different frequencies and the archive contains a separate dataset per each frequency. Seven of the  
18 datasets have series with missing values. The archive contains 2 versions of each of these, one with  
19 and one without missing values. In the latter case, the missing values have been replaced by using  
20 an appropriate imputation technique as explained in Sections A.6 and A.7. Finally, we obtain 50  
21 datasets with the above explained different versions.

22 The 50 datasets are then converted into .tsf format which is a new format we introduce to store  
23 time series datasets as explained in the Section 2.1 of our original manuscript. The .tsf files are  
24 zipped and uploaded into our datasets archive available at [https://zenodo.org/communities/](https://zenodo.org/communities/forecasting)  
25 forecasting where the other researchers can directly download them for further research use. Code  
26 to load the datasets in .tsf format into R and Python is available in our github repository available at  
27 <https://github.com/rakshitha123/TSForecasting>.

## 28 **A.2 Intended use of datasets**

29 All datasets in our repository are intended to use only for research purposes and to evaluate the  
30 performance of new forecasting algorithms.

## 31 **A.3 Hosting, licensing, maintenance and preservation**

32 All datasets are permanently available, and they are hosted and maintained at <https://zenodo.org/communities/forecasting> where the researchers can directly download the datasets. All  
33 datasets are under Creative Commons Attribution 4.0 International license where the users can modify,  
34 distribute and use the datasets as long as they credit the authors for the downloaded datasets from the  
35 repository.

36 Furthermore, a summary of datasets, links to download all datasets, the extracted features of each  
37 time series of all datasets, benchmark results of the datasets across 8 error metrics and links to  
38 all implementations related to the archive are hosted and maintained in our website at <https://forecastingdata.org/>.

39 We also encourage other researchers to contribute time series datasets to our repository either by  
40 directly uploading them into the archive and/or by contacting the authors via email.

## 43 **A.4 Code availability and reproducibility of results**

44 All implementations related to the forecasting archive including code for loading the datasets in  
45 our .tsf format into the R and Python environments, code for feature calculations and evaluation  
46 of baseline forecasting models are publicly available at <https://github.com/rakshitha123/TSForecasting>.

47 We ensure that both feature analysis and benchmark results are reproducible. The instructions on  
48 executing the related experiments are available in our github repository. The implementations are  
49 there in both R and Python programming languages and they do not require any paid dependencies.

## 51 **A.5 Author statement**

52 We, all authors bear all responsibility in case of violation of datasets rights. We have checked the  
53 licensing of all datasets and have only uploaded the publicly shareable datasets to our repository. We  
54 have also mentioned the original sources of all datasets in our website, <https://forecastingdata.org/>.

55 If there are any copyright issues of the datasets, please contact the authors via email.

56 The next sections explain the datasets in our repository in detail.

## 58 **A.6 Time series datasets**

59 This section describes the benchmark datasets that have a sufficient number of series from a particular  
60 frequency. The datasets may contain different categories in terms of domain and frequency.

### 61 **A.6.1 M1 dataset**

62 The M1 competition dataset [4] contains 1001 time series with 3 different frequencies: yearly,  
63 quarterly, and monthly as shown in Table 1. The series belong to 7 different domains: macro 1, macro  
64 2, micro 1, micro 2, micro 3, industry, and demographic.

65 Research work which uses this dataset includes:

- 66 • Forecasting with artificial neural networks: the state of the art [5]
- 67 • Time series forecasting using a hybrid ARIMA and neural network model [6]
- 68 • Automatic time series forecasting: the forecast package for R [7]
- 69 • Exponential Smoothing: the state of the art [8]

Table 1: Summary of M1 dataset

| Frequency | No: of Series | Min. Length | Max. Length | Forecast Horizon |
|-----------|---------------|-------------|-------------|------------------|
| Yearly    | 181           | 15          | 58          | 6                |
| Quarterly | 203           | 18          | 114         | 8                |
| Monthly   | 617           | 48          | 150         | 18               |
| Total     | 1001          |             |             |                  |

- Neural network forecasting for seasonal and trend time series [9]

The DOI links to access and download the datasets are as follows:

- Yearly dataset: <http://doi.org/10.5281/zenodo.4656193>
- Quarterly dataset: <http://doi.org/10.5281/zenodo.4656154>
- Monthly dataset: <http://doi.org/10.5281/zenodo.4656159>

### A.6.2 M3 dataset

The M3 competition dataset [10] contains 3003 time series of various frequencies including yearly, quarterly, and monthly, as shown in Table 2. The series belong to 6 different domains: demographic, micro, macro, industry, finance, and other.

Table 2: Summary of M3 dataset

| Frequency | No: of Series | Min. Length | Max. Length | Forecast Horizon |
|-----------|---------------|-------------|-------------|------------------|
| Yearly    | 645           | 20          | 47          | 6                |
| Quarterly | 756           | 24          | 72          | 8                |
| Monthly   | 1428          | 66          | 144         | 18               |
| Other     | 174           | 71          | 104         | 8                |
| Total     | 3003          |             |             |                  |

Research work which uses this dataset includes:

- The theta model: a decomposition approach to forecasting [11]
- Recurrent neural networks for time series forecasting: current status and future directions [12]
- Ensembles of localised models for time series forecasting [13]
- Out-of-sample tests of forecasting accuracy: an analysis and review [14]
- Metrics for evaluating performance of prognostic techniques [15]
- Temporal link prediction using matrix and tensor factorizations [16]
- Forecasting time series with complex seasonal patterns using exponential smoothing [17]
- Evaluating forecasting methods [18]
- Exponential smoothing with a damped multiplicative trend [19]

The DOI links to access and download the datasets are as follows:

- Yearly dataset: <http://doi.org/10.5281/zenodo.4656222>
- Quarterly dataset: <http://doi.org/10.5281/zenodo.4656262>
- Monthly dataset: <http://doi.org/10.5281/zenodo.4656298>
- Other dataset: <http://doi.org/10.5281/zenodo.4656335>

Table 3: Summary of M4 dataset

| Frequency | No: of Series | Min. Length | Max. Length | Forecast Horizon |
|-----------|---------------|-------------|-------------|------------------|
| Yearly    | 23000         | 19          | 841         | 6                |
| Quarterly | 24000         | 24          | 874         | 8                |
| Monthly   | 48000         | 60          | 2812        | 18               |
| Weekly    | 359           | 93          | 2610        | 13               |
| Daily     | 4227          | 107         | 9933        | 14               |
| Hourly    | 414           | 748         | 1008        | 48               |
| Total     | 100000        |             |             |                  |

### 95 A.6.3 M4 dataset

96 The M4 competition dataset [20, 21] contains 100,000 time series with 6 different frequencies: yearly,  
 97 quarterly, monthly, weekly, daily, and hourly, as shown in Table 3. The series belong to 6 different  
 98 domains: demographic, micro, macro, industry, finance, and other, similar to the M3 forecasting  
 99 competition. This dataset contains a subset of series available at ForeDeCk [22].

100 Research work which uses this dataset includes:

- 101 • A hybrid method of exponential smoothing and recurrent neural networks for time series  
 102 forecasting [23]
- 103 • FFORMA: Feature-based Forecast Model Averaging [24]
- 104 • Ensembles of localised models for time series forecasting [13]
- 105 • Recurrent neural networks for time series forecasting: current status and future directions  
 106 [12]
- 107 • LSTM-MSNet: leveraging forecasts on sets of related time series with multiple seasonal  
 108 patterns [25]
- 109 • Are forecasting competitions data representative of the reality? [26]
- 110 • Averaging probability forecasts: back to the future [27]
- 111 • A strong baseline for weekly time series forecasting [28]

112 The DOI links to access and download the datasets are as follows:

- 113 • Yearly dataset: <http://doi.org/10.5281/zenodo.4656379>
- 114 • Quarterly dataset: <http://doi.org/10.5281/zenodo.4656410>
- 115 • Monthly dataset: <http://doi.org/10.5281/zenodo.4656480>
- 116 • Weekly dataset: <http://doi.org/10.5281/zenodo.4656522>
- 117 • Daily dataset: <http://doi.org/10.5281/zenodo.4656548>
- 118 • Hourly dataset: <http://doi.org/10.5281/zenodo.4656589>

### 119 A.6.4 Tourism dataset

120 This dataset originates from a Kaggle competition [29, 30] and contains 1311 tourism related time  
 121 series with 3 different frequencies: yearly, quarterly, and monthly as shown in Table 4.

Table 4: Summary of tourism dataset

| Frequency | No: of Series | Min. Length | Max. Length | Forecast Horizon |
|-----------|---------------|-------------|-------------|------------------|
| Yearly    | 518           | 11          | 47          | 4                |
| Quarterly | 427           | 30          | 130         | 8                |
| Monthly   | 366           | 91          | 333         | 24               |
| Total     | 1311          |             |             |                  |

122 Research work which uses this dataset includes:

- 123 • Recurrent neural networks for time series forecasting: current status and future directions  
124 [12]
- 125 • A meta-analysis of international tourism demand forecasting and implications for practice  
126 [31]
- 127 • Improving forecasting by estimating time series structural components across multiple  
128 frequencies [32]
- 129 • Forecasting tourist arrivals using time-varying parameter structural time series models [33]
- 130 • Forecasting monthly and quarterly time series using STL decomposition [34]
- 131 • A novel approach to model selection in tourism demand modeling [35]

132 The DOI links to access and download the datasets are as follows:

- 133 • Yearly dataset: <http://doi.org/10.5281/zenodo.4656103>
- 134 • Quarterly dataset: <http://doi.org/10.5281/zenodo.4656093>
- 135 • Monthly dataset: <http://doi.org/10.5281/zenodo.4656096>

#### 136 **A.6.5 NN5 dataset**

137 This dataset contains 111 time series of daily cash withdrawals from Automated Teller Machines  
138 (ATM) in the UK, and was used in the NN5 forecasting competition [36]. The forecast horizon  
139 considered in the competition was 56. The original dataset contains missing values. Our repository  
140 contains two versions of the dataset: the original version with missing values and a modified version  
141 where the missing values have been replaced using a median substitution where a missing value on a  
142 particular day is replaced by the median across all the same days of the week along the whole series  
143 as in Hewamalage et al. [12]. Furthermore, Godahewa et al. [28] use the weekly aggregated version  
144 of this dataset for their experiments related to proposing a baseline model for weekly forecasting. The  
145 aggregated weekly version of this dataset is also available in our repository. Research work which  
146 uses this dataset includes:

- 147 • Recurrent neural networks for time series forecasting: current status and future directions  
148 [12]
- 149 • A strong baseline for weekly time series forecasting [28]
- 150 • Forecasting across time series databases using recurrent neural networks on groups of similar  
151 series: a clustering approach [37]
- 152 • Forecast combinations of computational intelligence and linear models for the NN5 time  
153 series forecasting competition [38]
- 154 • Forecasting the NN5 time series with hybrid models [39]
- 155 • Multiple-output modeling for multi-step-ahead time series forecasting [40]
- 156 • Recursive multi-step time Series forecasting by perturbing data [41]
- 157 • Benchmarking of classical and machine-learning algorithms (with special emphasis on  
158 bagging and boosting approaches) for time series forecasting [42]

159 The DOI links to access and download the datasets are as follows:

- 160 • Daily dataset with missing values: <http://doi.org/10.5281/zenodo.4656110>
- 161 • Daily dataset without missing values: <http://doi.org/10.5281/zenodo.4656117>
- 162 • Weekly dataset: <http://doi.org/10.5281/zenodo.4656125>

#### 163 **A.6.6 CIF 2016 dataset**

164 The dataset from the Computational Intelligence in Forecasting (CIF) 2016 forecasting competition  
165 contains 72 monthly time series. Out of those, 24 series originate from the banking sector, and  
166 the remaining 48 series are artificially generated. There are 2 forecast horizons considered in the  
167 competition where 57 series have a forecasting horizon of 12 and the remaining 15 series consider  
168 the forecast horizon as 6 [43]. Research work which uses this dataset includes:

- 169 • Recurrent neural networks for time series forecasting: current status and future directions  
170 [12]
- 171 • Ensembles of localised models for time series forecasting [13]
- 172 • Forecasting across time series databases using recurrent neural networks on groups of similar  
173 series: a clustering approach [37]
- 174 • Improving time series forecasting: an approach combining bootstrap aggregation, clusters  
175 and exponential smoothing [44]
- 176 • Time series clustering using numerical and fuzzy representations [45]
- 177 • An automatic calibration framework applied on a metaheuristic fuzzy model for the CIF  
178 competition [46]

179 The DOI link to access and download the dataset is <http://doi.org/10.5281/zenodo.4656042>.

#### 180 **A.6.7 Kaggle web traffic dataset**

181 This dataset contains 145063 daily time series representing the number of hits or web traffic for a  
182 set of Wikipedia pages from 01/07/2015 to 10/09/2017 used by the Kaggle web traffic forecasting  
183 competition [47]. The forecast horizon considered in the competition was 59. As the original dataset  
184 contains missing values, we include both the original dataset in our repository and an imputed version.  
185 This dataset is intermittent and hence, we impute missing values with zeros. Furthermore, Godahewa  
186 et al. [28] use the weekly aggregated version of this dataset containing the first 1000 series. Our  
187 repository also contains this aggregated weekly version of the dataset for all series. The missing  
188 values of the original dataset were imputed before the aggregation. Research work which uses this  
189 dataset includes:

- 190 • Recurrent neural networks for time series forecasting: current status and future directions  
191 [12]
- 192 • Ensembles of localised models for time series forecasting [13]
- 193 • A strong baseline for weekly time series forecasting [28]
- 194 • Web traffic prediction of Wikipedia pages [48]
- 195 • Improving time series forecasting using mathematical and deep learning models [49]
- 196 • Foundations of sequence-to-sequence modeling for time series [50]

197 The DOI links to access and download the datasets are as follows:

- 198 • Daily dataset with missing values: <http://doi.org/10.5281/zenodo.4656080>
- 199 • Daily dataset without missing values: <http://doi.org/10.5281/zenodo.4656075>
- 200 • Weekly dataset: <http://doi.org/10.5281/zenodo.4656664>

#### 201 **A.6.8 Solar dataset**

202 This dataset contains 137 time series representing the solar power production recorded every 10  
203 minutes in the state of Alabama in 2006. It was used by Lai et al. [1], and originally extracted from  
204 Solar [51]. Furthermore, Godahewa et al. [28] use an aggregated version of this dataset containing  
205 weekly solar power production records. The aggregated weekly version of this dataset is also available  
206 in our repository.

207 The DOI links to access and download the datasets are as follows:

- 208 • 10 minutes dataset: <http://doi.org/10.5281/zenodo.4656144>
- 209 • Weekly dataset: <http://doi.org/10.5281/zenodo.4656151>

#### 210 **A.6.9 Electricity dataset**

211 This dataset represents the hourly electricity consumption of 321 clients from 2012 to 2014 in kilowatt  
212 (kW). It was used by Lai et al. [1], and originally extracted from UCI [52]. Our repository also  
213 contains an aggregated version of this dataset representing the weekly electricity consumption values.

214 The DOI links to access and download the datasets are as follows:

- 215 • Hourly dataset: <http://doi.org/10.5281/zenodo.4656140>
- 216 • Weekly dataset: <http://doi.org/10.5281/zenodo.4656141>

#### 217 **A.6.10 London smart meters dataset**

218 This dataset contains 5560 half-hourly time series that represent the energy consumption readings of  
219 London households in kWh from November 2011 to February 2014 [53]. The series are categorized  
220 into 112 blocks in the original dataset. The series in our repository are in the same order (from block  
221 0 to block 111) as they are in the original dataset. The original dataset contains missing values and  
222 we impute them using the last observation carried forward (LOCF) method. Our repository contains  
223 both versions: the original version with missing values and the modified version where the missing  
224 values have been replaced. Research work which uses this dataset includes:

- 225 • Predicting electricity consumption using deep recurrent neural networks [54]
- 226 • A single scalable LSTM model for short-term forecasting of disaggregated electricity loads  
227 [55]
- 228 • Deep learning based short-term load forecasting for urban areas [56]
- 229 • Smart grid energy management using RNN-LSTM: a deep learning-based approach [57]

230 The DOI links to access and download the datasets are as follows:

- 231 • Dataset with missing values: <http://doi.org/10.5281/zenodo.4656072>
- 232 • Dataset without missing values: <http://doi.org/10.5281/zenodo.4656091>

#### 233 **A.6.11 Wind farms dataset**

234 This dataset contains very long minutely time series representing the wind power production of 339  
235 wind farms in Australia. It was extracted from the Australian Energy Market Operator (AEMO) online  
236 platform [58]. The series in this dataset range from 01/08/2019 to 31/07/2020. The original dataset  
237 contains missing values where some series contain missing data for more than seven consecutive  
238 days. Our repository contains both the original version of the dataset and a version where the missing  
239 values have been replaced by zeros.

240 The DOI links to access and download the datasets are as follows:

- 241 • Dataset with missing values: <http://doi.org/10.5281/zenodo.4654909>
- 242 • Dataset without missing values: <http://doi.org/10.5281/zenodo.4654858>

#### 243 **A.6.12 Car parts dataset**

244 This dataset contains 2674 intermittent monthly time series showing car parts sales from January  
245 1998 to March 2002. It was extracted from the R package expsmooth [59]. The package contains this  
246 dataset as “*carparts*”. As the original dataset contains missing values, we include the original version  
247 of the dataset in the repository as well as a version where the missing values have been replaced with  
248 zeros, as the series are intermittent. Research work which uses this dataset includes:

- 249 • Principles and algorithms for forecasting groups of time series: locality and globality [60]

250 The DOI links to access and download the datasets are as follows:

- 251 • Dataset with missing values: <http://doi.org/10.5281/zenodo.4656022>
- 252 • Dataset without missing values: <http://doi.org/10.5281/zenodo.4656021>

#### 253 **A.6.13 Dominick dataset**

254 This dataset contains 115704 weekly time series representing the profit of individual stock keeping  
255 units (SKU) from a retailer.

256 It was extracted from the Kilts Center, University of Chicago Booth School of Business online  
257 platform [61]. This platform also contains daily store-level sales data on more than 3500 products  
258 collected from Dominick’s Finer Foods, a large American retail chain in the Chicago area, for  
259 approximately 9 years. The data are provided in different categories such as customer counts,  
260 store-specific demographics and sales products. Research work which uses this dataset includes:

- 261 • Principles and algorithms for forecasting groups of time series: locality and globality [60]
- 262 • The value of competitive information in forecasting FMCG retail product sales and the  
263 variable selection problem [62]
- 264 • Beer snobs do exist: estimation of beer demand by type [63]
- 265 • Downsizing and supersizing: how changes in product attributes influence consumer prefer-  
266 ences [64]
- 267 • Reference prices, costs, and nominal rigidities [65]
- 268 • Sales and monetary policy [66]

269 The DOI link to access and download the dataset is <http://doi.org/10.5281/zenodo.4654802>.

#### 270 **A.6.14 FRED-MD dataset**

271 This dataset contains 107 monthly time series showing a set of macro-economic indicators from the  
272 Federal Reserve Bank [67] starting from 01/01/1959. It was extracted from the FRED-MD database.  
273 The series are differenced and log-transformed as suggested in the literature. Research work which  
274 uses this dataset includes:

- 275 • Principles and algorithms for forecasting groups of time series: locality and globality [60]

276 The DOI link to access and download the dataset is <http://doi.org/10.5281/zenodo.4654833>.

#### 277 **A.6.15 San Francisco traffic dataset**

278 This dataset contains 862 hourly time series showing the road occupancy rates on San Francisco Bay  
279 area freeways from 2015 to 2016. It was used by Lai et al. [1], and originally extracted from Caltrans  
280 [68]. Godahewa et al. [28] use a weekly aggregated version of this dataset, which is also available in  
281 our repository.

282 The DOI links to access and download the datasets are as follows:

- 283 • Hourly dataset: <http://doi.org/10.5281/zenodo.4656132>
- 284 • Weekly dataset: <http://doi.org/10.5281/zenodo.4656135>

#### 285 **A.6.16 Melbourne pedestrian counts dataset**

286 This dataset contains hourly pedestrian counts captured from 66 sensors in Melbourne city starting  
287 from May 2009 [69]. The original data are updated on a monthly basis when the new observations  
288 become available. The dataset in our repository contains pedestrian counts up to 30/04/2020. Research  
289 work which uses this dataset includes:

- 290 • Enhancing pedestrian mobility in smart cities using big data [70]
- 291 • Visualising Melbourne pedestrian count [71]
- 292 • PedaViz: visualising hour-level pedestrian activity [72]

293 The DOI link to access and download the dataset is <http://doi.org/10.5281/zenodo.4656626>.

#### 294 **A.6.17 Hospital dataset**

295 This dataset contains 767 monthly time series showing the patient counts related to medical products  
296 from January 2000 to December 2006. It was extracted from the R package `expsmooth` [59]. The  
297 package contains this dataset as *“hospital”*. Research work which uses this dataset includes:



298       • Principles and algorithms for forecasting groups of time series: locality and globality [60]  
299 The DOI link to access and download the dataset is <http://doi.org/10.5281/zenodo.4656014>.

#### 300 **A.6.18 COVID deaths dataset**

301 This dataset contains 266 daily time series that represent the total COVID-19 deaths in a set of  
302 countries and states from 22/01/2020 to 20/08/2020. It was extracted from the Johns Hopkins  
303 repository [3, 73]. The original data are updated on a daily basis when the new observations become  
304 available.

305 The DOI link to access and download the dataset is <http://doi.org/10.5281/zenodo.4656009>.

#### 306 **A.6.19 KDD cup 2018 dataset**

307 This competition dataset contains long hourly time series representing the air quality levels in 59  
308 stations in 2 cities, Beijing (35 stations) and London (24 stations) from 01/01/2017 to 31/03/2018  
309 [74]. The dataset represents the air quality in multiple measurements such as  $PM_{2.5}$ ,  $PM_{10}$ ,  $NO_2$ ,  
310  $CO$ ,  $O_3$  and  $SO_2$  levels.

311 Our repository dataset contains 270 hourly time series which have been categorized using city, station  
312 name, and air quality measurement.

313 As the original dataset contains missing values, we include both the original dataset and an imputed  
314 version in our repository. We impute leading missing values with zeros and the remaining missing  
315 values using the LOCF method. Research work which uses this dataset includes:

- 316       • AccuAir: winning solution to air quality prediction for KDD cup 2018 [75]

317 The DOI links to access and download the datasets are as follows:

- 318       • Dataset with missing values: <http://doi.org/10.5281/zenodo.4656719>
- 319       • Dataset without missing values: <http://doi.org/10.5281/zenodo.4656756>

#### 320 **A.6.20 Weather dataset**

321 This dataset contains 3010 daily time series representing the variations of four weather variables:  
322 rain, minimum temperature, maximum temperature and solar radiation, measured at weather stations  
323 in Australia. The series were extracted from the R package *bomrang* [76]. Research work which uses  
324 this dataset includes:

- 325       • Principles and algorithms for forecasting groups of time series: locality and globality [60]

326 The DOI link to access and download the dataset is <http://doi.org/10.5281/zenodo.4654822>.

### 327 **A.7 Single long time series datasets**

328 This section describes the benchmark datasets which have single time series with a large amount of  
329 data points.

#### 330 **A.7.1 Sunspot dataset**

331 The original data source contains a single very long daily time series of sunspot numbers from  
332 01/01/1818 until the present [77]. Furthermore, it also contains monthly mean total sunspot numbers  
333 (starting from 1749), 13-month smoothed monthly total sunspot numbers (starting from 1749), yearly  
334 mean total sunspot numbers (starting from 1700), daily hemispheric sunspot numbers (starting  
335 from 1992), monthly mean hemispheric sunspot numbers (starting from 1992), 13-month smoothed  
336 monthly hemispheric sunspot numbers (starting from 1992), and yearly mean total sunspot numbers  
337 (starting from 1610). The original datasets are updated as new observations become available.

338 Our repository contains the single daily time series representing the sunspot numbers from 08/01/1818  
339 to 31/05/2020. As the dataset contains missing values, we include an LOCF-imputed version besides  
340 it in the repository. Research work which uses this dataset includes:

- Re-evaluation of predictive models in light of new data: sunspot number version 2.0 [78]
- Correlation between sunspot number and ca II K emission index [79]
- Dynamics of sunspot series on time scales from days to years: correlation of sunspot births, variable lifetimes, and evolution of the high-frequency spectral component [80]
- Long term sunspot cycle phase coherence with periodic phase disruptions [81]

The DOI links to access and download the datasets are as follows:

- Dataset with missing values: <http://doi.org/10.5281/zenodo.4654773>
- Dataset without missing values: <http://doi.org/10.5281/zenodo.4654722>

#### A.7.2 Saugeen river flow dataset

This dataset contains a single very long time series representing the daily mean flow of the Saugeen River at Walkerton in cubic meters per second from 01/01/1915 to 31/12/1979. The length of this time series is 23,741. It was extracted from the R package, *deseasonalize* [82]. The package contains this dataset as “*SaugeenDay*”.

Research work which uses this dataset includes:

- Telescope: an automatic feature extraction and transformation approach for time series forecasting on a level-playing field [83]

The DOI link to access and download the dataset is <http://doi.org/10.5281/zenodo.4656058>.

#### A.7.3 US births dataset

This dataset contains a single very long daily time series representing the number of births in the US from 01/01/1969 to 31/12/1988. The length of this time series is 7,305. It was extracted from the R package, *mosaicData* [84]. The package contains this dataset as “*Births*”. Research work which uses this dataset includes:

- Telescope: an automatic feature extraction and transformation approach for time series forecasting on a level-playing field [83]

The DOI link to access and download the dataset is <http://doi.org/10.5281/zenodo.4656049>.

#### A.7.4 Electricity demand dataset

This dataset contains a single very long time series representing the half hourly electricity demand for Victoria, Australia in 2014. The length of this time series is 17,520. It was extracted from the R package, *fpp2* [85]. The package contains this dataset as “*elecdemand*”. The temperatures corresponding with each demand value are also available in the original dataset. Research work which uses this dataset includes:

- Telescope: an automatic feature extraction and transformation approach for time series forecasting on a level-playing field [83]

The DOI link to access and download the dataset is <http://doi.org/10.5281/zenodo.4656069>.

#### A.7.5 Solar power dataset

This dataset contains a single very long time series representing the solar power production of an Australian wind farm recorded per each 4 seconds starting from 01/08/2019. It was extracted from the AEMO online platform [58]. The length of this time series is 7,397,222.

The DOI link to access and download the dataset is <http://doi.org/10.5281/zenodo.4656027>.

#### 380 **A.7.6 Wind power dataset**

381 This dataset contains a single very long time series representing the wind power production of an  
382 Australian wind farm recorded per each 4 seconds starting from 01/08/2019. It was extracted from  
383 the AEMO online platform [58]. The length of this time series is 7,397,147.

384 The DOI link to access and download the dataset is <http://doi.org/10.5281/zenodo.4656032>.

#### 385 **B Feature plots**

386 The following hexbin plots show the normalised density values of the low-dimensional features  
387 space generated by PCA for the datasets in our archive across 4 tsfeatures: ACF1, trend, entropy and  
388 seasonal strength, and the Box-Cox transformation parameter, lambda. The dark and light hexbins  
389 denote the high and low density areas respectively.

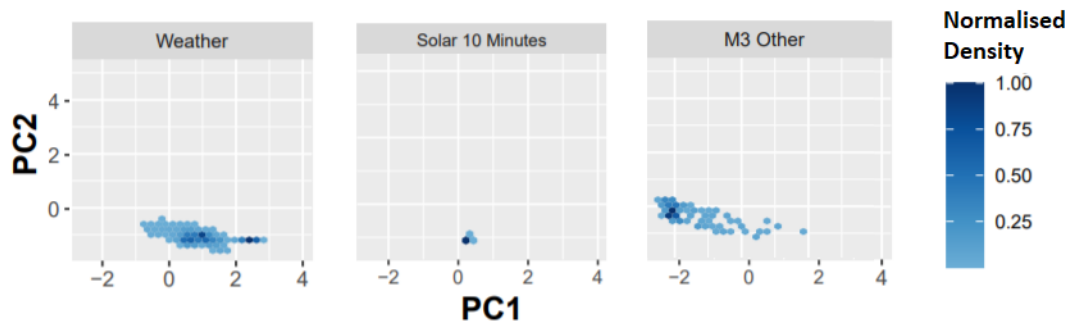

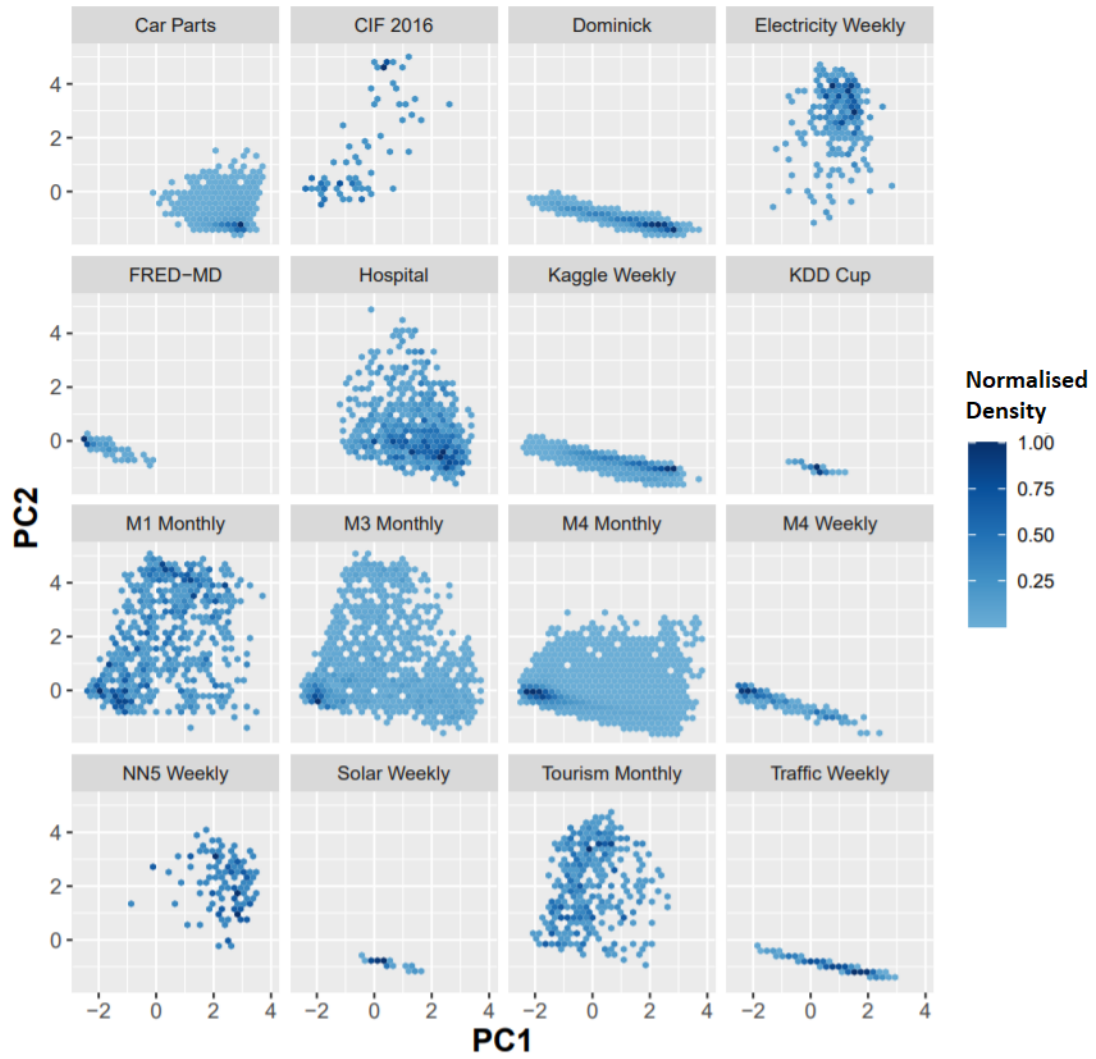

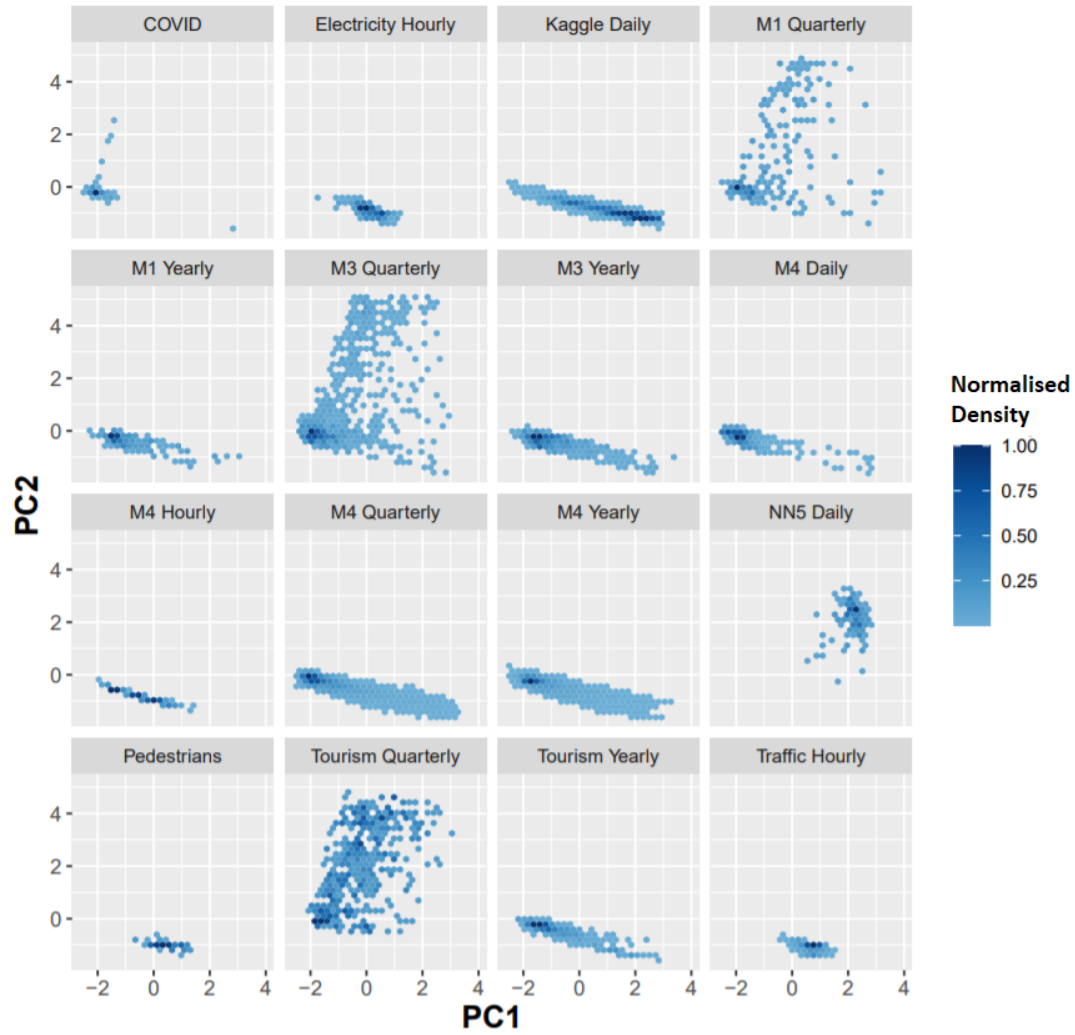

390 The following hexbin plots show the normalised density values of the low-dimensional features space  
 391 generated by PCA for the datasets in our archive across the catch22 features. The dark and light  
 392 hexbins denote the high and low density areas respectively.

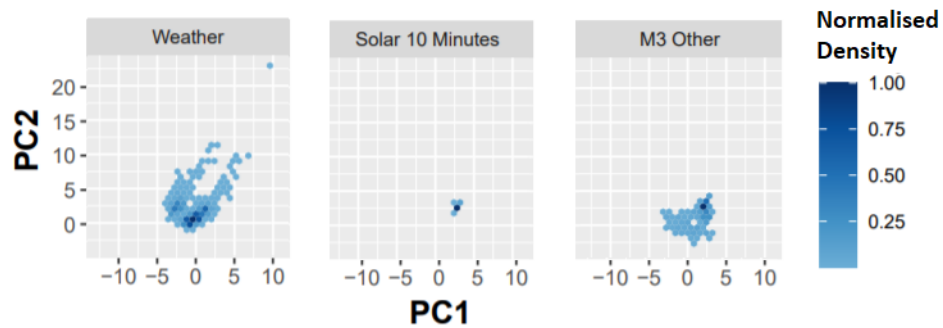

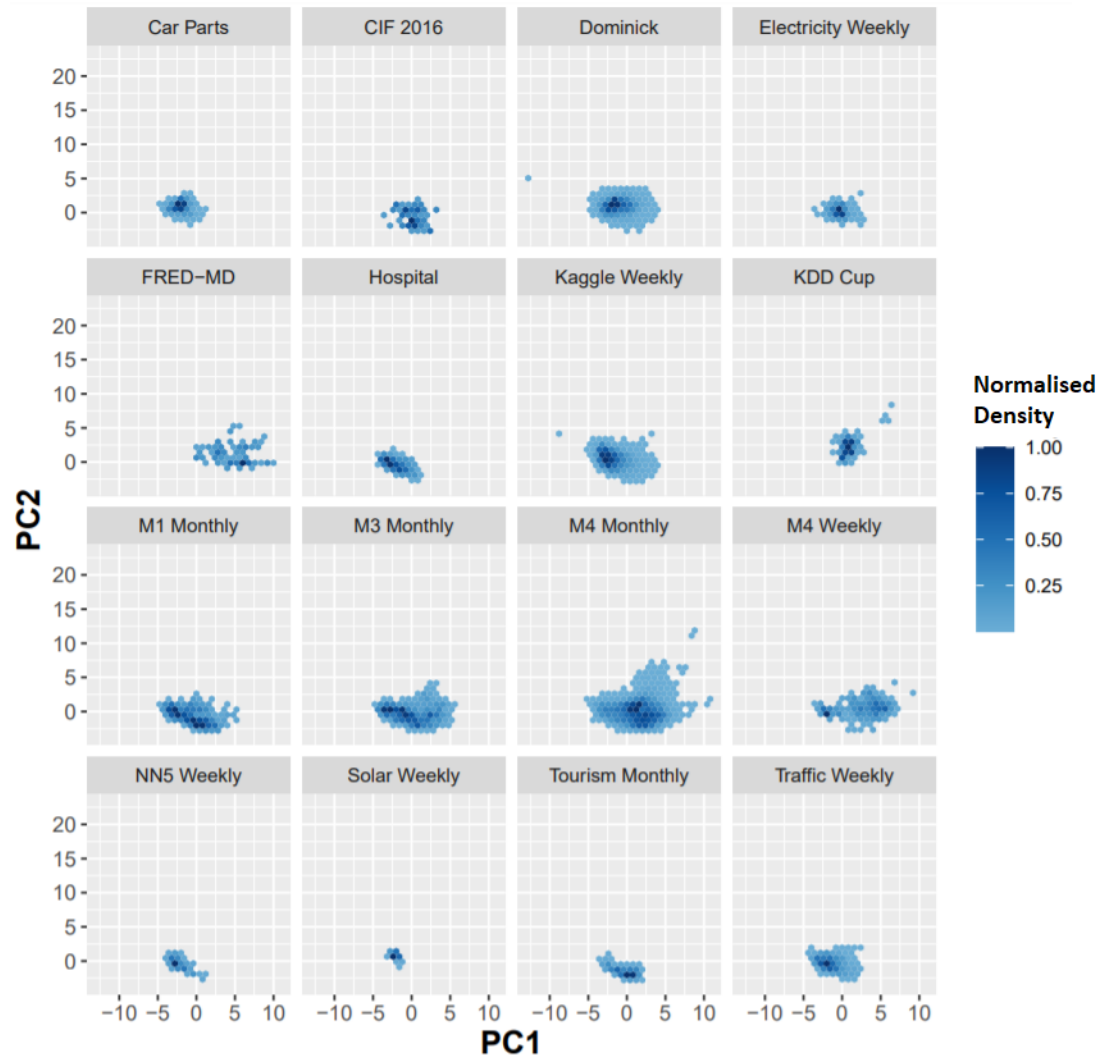

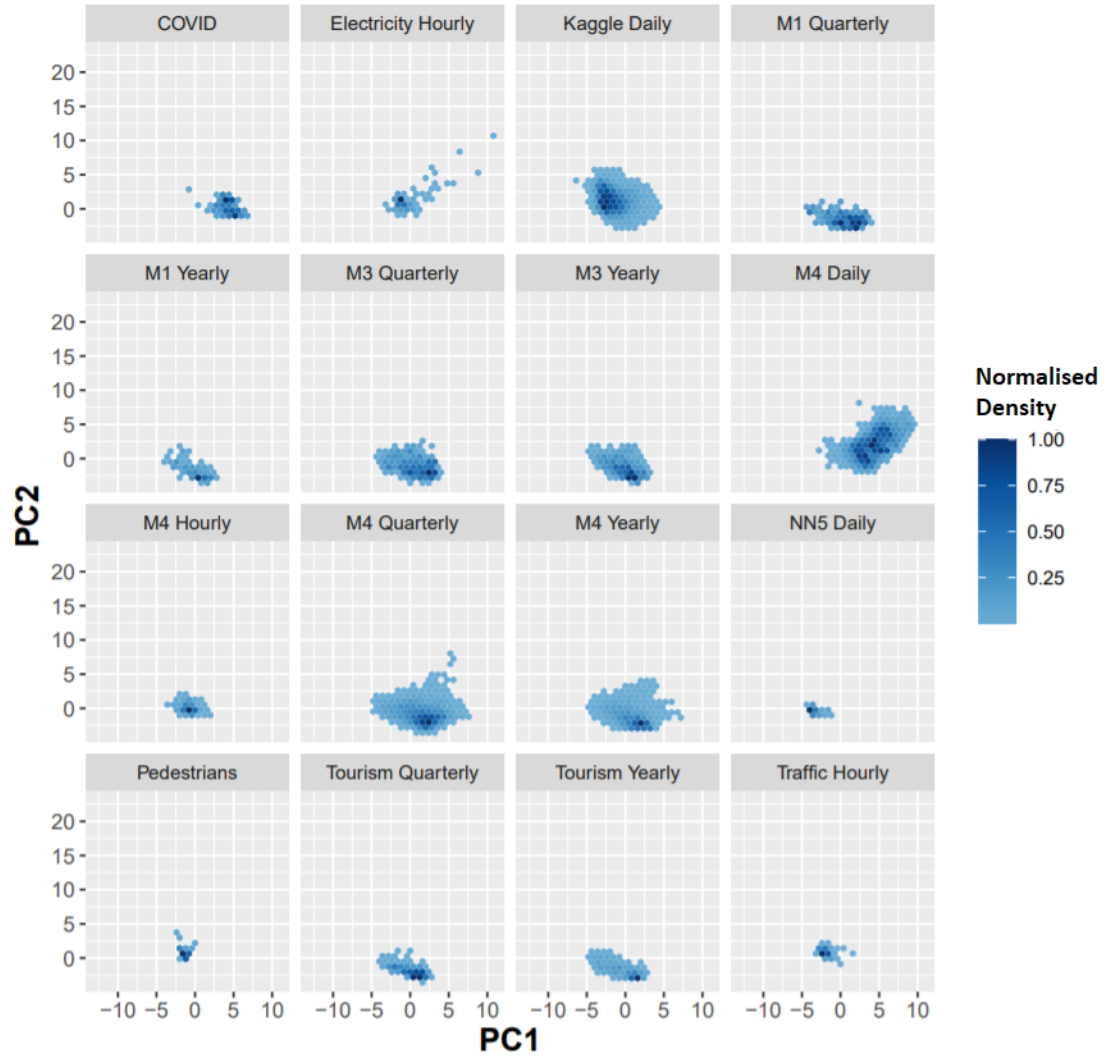

## C Baseline results

Tables 5, 6, 7, 8, 9, 10, 11, 12, 13 and 14 respectively show the mean MASE, median MASE, mean sMAPE, median sMAPE, mean msMAPE, median msMAPE, mean MAE, median MAE, mean RMSE and median RMSE results of SES, Theta, ETS, ARIMA, TBATS, DHR-ARIMA and PR models on all datasets.

Table 5: Mean MASE results

| Dataset            | SES    | Theta  | ETS   | ARIMA | TBATS        | DHR-ARIMA | PR    |
|--------------------|--------|--------|-------|-------|--------------|-----------|-------|
| NN5 Daily          | 1.521  | 0.885  | 0.865 | 1.013 | -            | -         | 1.263 |
| NN5 Weekly         | 0.903  | 0.885  | -     | -     | 0.872        | 0.887     | 0.854 |
| CIF 2016           | 1.291  | 0.997  | 0.841 | 0.929 | -            | -         | 1.019 |
| US Births          | 4.343  | 2.138  | 1.529 | 1.917 | -            | -         | 2.094 |
| Saugeen River Flow | 1.426  | 1.425  | 2.036 | 1.485 | -            | -         | 1.674 |
| Elecdemand         | 1.126  | 1.125  | -     | -     | 1.272        | 0.902     | 1.153 |
| Kaggle Daily       | 0.924  | 0.928  | 1.231 | 0.890 | -            | -         | -     |
| Kaggle Weekly      | 0.698  | 0.694  | -     | -     | 0.622        | 0.815     | 1.021 |
| Tourism Yearly     | 3.253  | 3.015  | 3.395 | 3.775 | -            | -         | 3.516 |
| Tourism Quarterly  | 3.210  | 1.661  | 1.592 | 1.782 | -            | -         | 1.643 |
| Tourism Monthly    | 3.306  | 1.649  | 1.526 | 1.589 | -            | -         | 1.678 |
| Traffic Hourly     | 1.922  | 1.922  | -     | -     | 2.482        | 2.535     | 1.281 |
| Traffic Weekly     | 1.116  | 1.121  | -     | -     | 1.148        | 1.191     | 1.122 |
| Electricity Hourly | 4.544  | 4.545  | -     | -     | 3.690        | 4.602     | 2.912 |
| Electricity Weekly | 1.536  | 1.476  | -     | -     | 0.792        | 0.878     | 0.916 |
| Solar 10 Minutes   | 1.451  | 1.452  | -     | -     | 3.936        | 1.034     | 1.451 |
| Solar Weekly       | 1.215  | 1.224  | -     | -     | 0.916        | 0.848     | 1.053 |
| Sunspot            | 0.128  | 0.128  | 0.128 | 0.067 | -            | -         | 0.099 |
| M1 Yearly          | 4.938  | 4.191  | 3.771 | 4.479 | -            | -         | 4.588 |
| M1 Quarterly       | 1.929  | 1.702  | 1.658 | 1.787 | -            | -         | 1.892 |
| M1 Monthly         | 1.379  | 1.091  | 1.074 | 1.164 | -            | -         | 1.123 |
| M3 Yearly          | 3.167  | 2.774  | 2.860 | 3.417 | -            | -         | 3.223 |
| M3 Quarterly       | 1.417  | 1.117  | 1.170 | 1.240 | -            | -         | 1.248 |
| M3 Monthly         | 1.091  | 0.864  | 0.865 | 0.873 | -            | -         | 1.010 |
| M3 Other           | 3.089  | 2.271  | 1.814 | 1.831 | -            | -         | 2.655 |
| M4 Yearly          | 3.981  | 3.375  | 3.444 | 3.876 | -            | -         | 3.625 |
| M4 Quarterly       | 1.417  | 1.231  | 1.161 | 1.228 | -            | -         | 1.316 |
| M4 Monthly         | 1.150  | 0.970  | 0.948 | 0.962 | -            | -         | 1.080 |
| M4 Weekly          | 0.587  | 0.546  | -     | -     | 0.504        | 0.550     | 0.481 |
| M4 Daily           | 1.154  | 1.153  | 1.239 | 1.179 | -            | -         | 1.162 |
| M4 Hourly          | 11.607 | 11.524 | -     | -     | 2.663        | 13.557    | 1.662 |
| Pedestrian Counts  | 0.957  | 0.958  | -     | -     | 1.297        | 3.947     | 0.256 |
| KDD Cup            | 1.645  | 1.646  | -     | -     | 1.394        | 1.982     | 1.265 |
| Carparts           | 0.897  | 0.914  | 0.925 | 0.926 | -            | -         | 0.755 |
| Hospital           | 0.813  | 0.761  | 0.765 | 0.787 | -            | -         | 0.782 |
| Covid Deaths       | 7.776  | 7.793  | 5.326 | 6.117 | -            | -         | 8.731 |
| FRED-MD            | 0.617  | 0.698  | 0.468 | 0.533 | -            | -         | 8.827 |
| Dominick           | 0.582  | 0.610  | -     | -     | 72721475.060 | 0.796     | 0.980 |
| Weather            | 0.677  | 0.749  | 0.702 | 0.746 | -            | -         | 3.046 |



Table 6: Median MASE results

| Dataset            | SES   | Theta | ETS   | ARIMA | TBATS | DHR-ARIMA | PR    |
|--------------------|-------|-------|-------|-------|-------|-----------|-------|
| NN5 Daily          | 1.482 | 0.838 | 0.809 | 0.926 | -     | -         | 1.224 |
| NN5 Weekly         | 0.781 | 0.805 | -     | -     | 0.827 | 0.769     | 0.781 |
| CIF 2016           | 0.862 | 0.662 | 0.532 | 0.559 | -     | -         | 0.746 |
| US Births          | 4.343 | 2.138 | 1.529 | 1.917 | -     | -         | 2.094 |
| Saugeen River Flow | 1.426 | 1.425 | 2.036 | 1.485 | -     | -         | 1.674 |
| Elecdemand         | 1.126 | 1.125 | -     | -     | 1.272 | 0.902     | 1.153 |
| Kaggle Daily       | 0.539 | 0.548 | 0.667 | 0.528 | -     | -         | -     |
| Kaggle Weekly      | 0.432 | 0.418 | -     | -     | 0.330 | 0.529     | 0.573 |
| Tourism Yearly     | 2.442 | 2.360 | 2.373 | 2.719 | -     | -         | 2.356 |
| Tourism Quarterly  | 2.309 | 1.348 | 1.275 | 1.388 | -     | -         | 1.361 |
| Tourism Monthly    | 2.336 | 1.382 | 1.276 | 1.337 | -     | -         | 1.484 |
| Traffic Hourly     | 1.817 | 1.817 | -     | -     | 1.380 | 2.365     | 1.228 |
| Traffic Weekly     | 0.973 | 0.983 | -     | -     | 0.996 | 1.035     | 0.980 |
| Electricity Hourly | 4.766 | 4.766 | -     | -     | 2.300 | 4.630     | 2.878 |
| Electricity Weekly | 1.341 | 1.303 | -     | -     | 0.705 | 0.798     | 0.842 |
| Solar 10 Minutes   | 1.403 | 1.404 | -     | -     | 2.431 | 1.029     | 1.403 |
| Solar Weekly       | 1.231 | 1.241 | -     | -     | 0.894 | 0.861     | 1.063 |
| Sunspot            | 0.128 | 0.128 | 0.128 | 0.067 | -     | -         | 0.099 |
| M1 Yearly          | 3.772 | 3.155 | 2.324 | 2.127 | -     | -         | 2.847 |
| M1 Quarterly       | 1.417 | 1.264 | 1.196 | 1.171 | -     | -         | 1.376 |
| M1 Monthly         | 1.167 | 0.885 | 0.851 | 0.894 | -     | -         | 0.947 |
| M3 Yearly          | 2.261 | 1.985 | 1.907 | 2.003 | -     | -         | 2.267 |
| M3 Quarterly       | 1.073 | 0.831 | 0.855 | 0.917 | -     | -         | 0.902 |
| M3 Monthly         | 0.861 | 0.721 | 0.712 | 0.704 | -     | -         | 0.825 |
| M3 Other           | 2.771 | 1.896 | 1.489 | 1.418 | -     | -         | 2.067 |
| M4 Yearly          | 2.940 | 2.312 | 2.329 | 2.753 | -     | -         | 2.568 |
| M4 Quarterly       | 1.142 | 0.973 | 0.886 | 0.925 | -     | -         | 1.038 |
| M4 Monthly         | 0.867 | 0.763 | 0.736 | 0.727 | -     | -         | 0.844 |
| M4 Weekly          | 0.441 | 0.416 | -     | -     | 0.365 | 0.382     | 0.392 |
| M4 Daily           | 0.862 | 0.861 | 0.859 | 0.867 | -     | -         | 0.868 |
| M4 Hourly          | 3.685 | 3.688 | -     | -     | 1.873 | 3.507     | 1.010 |
| Pedestrian Counts  | 0.604 | 0.605 | -     | -     | 1.004 | 4.125     | 0.128 |
| KDD Cup            | 1.357 | 1.357 | -     | -     | 1.246 | 1.744     | 1.035 |
| Carparts           | 0.562 | 0.482 | 0.562 | 0.600 | -     | -         | 0.375 |
| Hospital           | 0.745 | 0.723 | 0.731 | 0.733 | -     | -         | 0.740 |
| Covid Deaths       | 1.554 | 2.192 | 0.614 | 0.982 | -     | -         | 5.313 |
| FRED-MD            | 0.430 | 0.407 | 0.385 | 0.355 | -     | -         | 8.458 |
| Dominick           | 0.194 | 0.208 | -     | -     | 0.535 | 0.453     | 0.000 |
| Weather            | 0.618 | 0.624 | 0.643 | 0.687 | -     | -         | 1.755 |

Table 7: Mean sMAPE results

| Dataset            | SES    | Theta  | ETS    | ARIMA  | TBATS  | DHR-ARIMA | PR     |
|--------------------|--------|--------|--------|--------|--------|-----------|--------|
| NN5 Daily          | 35.50  | 22.01  | 21.57  | 26.01  | -      | -         | 30.30  |
| NN5 Weekly         | 12.24  | 11.96  | -      | -      | 11.63  | 11.84     | 11.45  |
| CIF 2016           | 14.95  | 13.05  | 12.18  | 11.70  | -      | -         | 12.33  |
| US Births          | 11.77  | 5.82   | 4.05   | 5.17   | -      | -         | 5.75   |
| Saugeen River Flow | 36.03  | 36.01  | 67.60  | 37.58  | -      | -         | 45.37  |
| Elecdemand         | 10.99  | 10.98  | -      | -      | 11.85  | 8.53      | 10.51  |
| Kaggle Daily       | -      | -      | -      | -      | -      | -         | -      |
| Kaggle Weekly      | -      | -      | -      | -      | -      | 122.64    | -      |
| Tourism Yearly     | 34.14  | 31.96  | 36.56  | 33.44  | -      | -         | 46.94  |
| Tourism Quarterly  | 27.41  | 15.37  | 15.07  | 16.58  | -      | -         | 15.86  |
| Tourism Monthly    | 36.39  | 19.90  | 19.02  | 19.73  | -      | -         | 21.11  |
| Traffic Hourly     | -      | 82.44  | -      | -      | 70.59  | 92.58     | -      |
| Traffic Weekly     | 12.49  | 12.56  | -      | -      | 12.88  | 13.54     | 12.55  |
| Electricity Hourly | -      | -      | -      | -      | 40.47  | -         | -      |
| Electricity Weekly | -      | 14.58  | -      | -      | -      | 10.86     | -      |
| Solar 10 Minutes   | 200.00 | 200.00 | -      | -      | 165.81 | 85.81     | 199.99 |
| Solar Weekly       | 24.59  | 24.76  | -      | -      | 19.05  | 17.87     | 21.65  |
| Sunspot            | 196.19 | 196.19 | 196.19 | 194.29 | -      | -         | 195.56 |
| M1 Yearly          | 23.10  | 20.17  | 18.61  | 19.47  | -      | -         | 18.79  |
| M1 Quarterly       | 18.10  | 16.35  | 17.47  | 16.62  | -      | -         | 16.67  |
| M1 Monthly         | 17.43  | 16.53  | 15.05  | 15.65  | -      | -         | 15.20  |
| M3 Yearly          | 17.76  | 16.76  | 17.00  | 18.84  | -      | -         | 17.13  |
| M3 Quarterly       | 10.90  | 9.20   | 9.68   | 10.24  | -      | -         | 9.77   |
| M3 Monthly         | 16.22  | 13.86  | 14.14  | 14.24  | -      | -         | 15.17  |
| M3 Other           | 6.28   | 4.92   | 4.37   | 4.35   | -      | -         | 5.32   |
| M4 Yearly          | 16.40  | 14.56  | 15.36  | 16.03  | -      | -         | 14.53  |
| M4 Quarterly       | 11.08  | 10.31  | 10.29  | 10.52  | -      | -         | 10.84  |
| M4 Monthly         | 14.38  | 13.01  | 13.53  | 13.08  | -      | -         | 13.74  |
| M4 Weekly          | 9.01   | 7.83   | -      | -      | 7.30   | 7.94      | 7.43   |
| M4 Daily           | 3.05   | 3.07   | 3.13   | 3.01   | -      | -         | 3.06   |
| M4 Hourly          | 42.95  | 42.98  | -      | -      | 28.12  | 35.99     | 11.68  |
| Pedestrian Counts  | 123.96 | 124.19 | -      | -      | 119.96 | 138.67    | 41.10  |
| KDD Cup            | 62.20  | 62.31  | -      | -      | 56.37  | 86.13     | 50.73  |
| Carparts           | -      | -      | -      | -      | -      | -         | -      |
| Hospital           | 17.98  | 17.31  | 17.50  | 17.83  | -      | -         | 17.60  |
| Covid Deaths       | -      | -      | -      | -      | -      | -         | -      |
| FRED-MD            | 10.65  | 13.41  | 10.33  | 11.36  | -      | -         | 33.21  |
| Dominick           | -      | -      | -      | -      | -      | -         | -      |
| Weather            | 62.16  | 68.24  | 62.85  | -      | -      | -         | -      |

Table 8: Median sMAPE results

| Dataset            | SES    | Theta  | ETS    | ARIMA  | TBATS  | DHR-ARIMA | PR     |
|--------------------|--------|--------|--------|--------|--------|-----------|--------|
| NN5 Daily          | 34.68  | 20.56  | 20.35  | 22.80  | -      | -         | 28.81  |
| NN5 Weekly         | 10.95  | 10.96  | -      | -      | 10.97  | 11.08     | 10.50  |
| CIF 2016           | 11.40  | 7.95   | 6.58   | 7.69   | -      | -         | 8.43   |
| US Births          | 11.77  | 5.82   | 4.05   | 5.17   | -      | -         | 5.75   |
| Saugeen River Flow | 36.03  | 36.01  | 67.60  | 37.58  | -      | -         | 45.37  |
| Elecdemand         | 10.99  | 10.98  | -      | -      | 11.85  | 8.53      | 10.51  |
| Kaggle Daily       | -      | -      | -      | -      | -      | -         | -      |
| Kaggle Weekly      | -      | -      | -      | -      | -      | 117.72    | -      |
| Tourism Yearly     | 18.81  | 16.83  | 19.20  | 22.66  | -      | -         | 16.88  |
| Tourism Quarterly  | 22.48  | 13.17  | 12.89  | 13.13  | -      | -         | 13.33  |
| Tourism Monthly    | 30.24  | 17.40  | 17.16  | 18.01  | -      | -         | 18.47  |
| Traffic Hourly     | -      | 74.21  | -      | -      | 55.69  | 86.56     | -      |
| Traffic Weekly     | 9.70   | 9.75   | -      | -      | 10.05  | 10.54     | 9.75   |
| Electricity Hourly | -      | -      | -      | -      | 23.23  | -         | -      |
| Electricity Weekly | -      | 11.72  | -      | -      | -      | 6.97      | -      |
| Solar 10 Minutes   | 200.00 | 200.00 | -      | -      | 161.88 | 85.73     | 200.00 |
| Solar Weekly       | 24.76  | 24.90  | -      | -      | 18.36  | 17.64     | 21.77  |
| Sunspot            | 196.19 | 196.19 | 196.19 | 194.29 | -      | -         | 195.56 |
| M1 Yearly          | 17.33  | 14.74  | 13.01  | 11.99  | -      | -         | 13.49  |
| M1 Quarterly       | 11.24  | 8.63   | 8.40   | 9.66   | -      | -         | 10.13  |
| M1 Monthly         | 14.35  | 11.18  | 10.82  | 11.51  | -      | -         | 11.88  |
| M3 Yearly          | 12.44  | 11.54  | 11.52  | 12.37  | -      | -         | 12.92  |
| M3 Quarterly       | 6.74   | 5.23   | 5.53   | 6.36   | -      | -         | 5.73   |
| M3 Monthly         | 10.71  | 9.25   | 9.13   | 9.01   | -      | -         | 10.40  |
| M3 Other           | 4.62   | 2.88   | 2.23   | 2.19   | -      | -         | 3.42   |
| M4 Yearly          | 11.41  | 9.23   | 8.97   | 10.20  | -      | -         | 9.49   |
| M4 Quarterly       | 6.94   | 6.06   | 5.61   | 5.80   | -      | -         | 6.34   |
| M4 Monthly         | 8.38   | 7.24   | 7.00   | 7.13   | -      | -         | 8.20   |
| M4 Weekly          | 5.17   | 5.19   | -      | -      | 4.81   | 5.10      | 4.99   |
| M4 Daily           | 1.99   | 2.01   | 1.99   | 2.01   | -      | -         | 2.00   |
| M4 Hourly          | 19.88  | 19.79  | -      | -      | 6.55   | 32.18     | 5.80   |
| Pedestrian Counts  | 123.48 | 124.69 | -      | -      | 118.71 | 142.81    | 36.80  |
| KDD Cup            | 60.40  | 60.57  | -      | -      | 53.99  | 85.87     | 52.82  |
| Carparts           | -      | -      | -      | -      | -      | -         | -      |
| Hospital           | 16.58  | 15.91  | 16.13  | 16.77  | -      | -         | 16.14  |
| Covid Deaths       | -      | -      | -      | -      | -      | -         | -      |
| FRED-MD            | 1.61   | 1.53   | 1.54   | 1.57   | -      | -         | 29.14  |
| Dominick           | -      | -      | -      | -      | -      | -         | -      |
| Weather            | 23.71  | 23.83  | 25.36  | -      | -      | -         | -      |

Table 9: Mean msMAPE results

| <b>Dataset</b>     | <b>SES</b> | <b>Theta</b> | <b>ETS</b> | <b>ARIMA</b> | <b>TBATS</b> | <b>DHR-ARIMA</b> | <b>PR</b> |
|--------------------|------------|--------------|------------|--------------|--------------|------------------|-----------|
| NN5 Daily          | 35.38      | 21.93        | 21.49      | 25.91        | -            | -                | 30.20     |
| NN5 Weekly         | 12.24      | 11.96        | -          | -            | 11.62        | 11.83            | 11.45     |
| CIF 2016           | 14.94      | 13.04        | 12.18      | 11.69        | -            | -                | 12.32     |
| US Births          | 11.77      | 5.82         | 4.05       | 5.17         | -            | -                | 5.75      |
| Saugeen River Flow | 35.99      | 35.97        | 67.50      | 37.55        | -            | -                | 45.32     |
| Elecdemand         | 10.85      | 10.84        | -          | -            | 11.70        | 8.42             | 10.38     |
| Kaggle Daily       | 45.87      | 47.98        | 57.94      | 44.39        | -            | -                | -         |
| Kaggle Weekly      | 45.10      | 47.72        | -          | -            | 40.88        | 65.55            | 72.93     |
| Tourism Yearly     | 34.10      | 31.93        | 36.52      | 33.39        | -            | -                | 46.92     |
| Tourism Quarterly  | 27.41      | 15.37        | 15.07      | 16.58        | -            | -                | 15.86     |
| Tourism Monthly    | 36.39      | 19.89        | 19.02      | 19.73        | -            | -                | 21.11     |
| Traffic Hourly     | 8.73       | 8.73         | -          | -            | 12.58        | 11.72            | 5.97      |
| Traffic Weekly     | 12.40      | 12.48        | -          | -            | 12.80        | 13.45            | 12.46     |
| Electricity Hourly | 44.39      | 44.94        | -          | -            | 40.15        | 43.78            | 30.00     |
| Electricity Weekly | 14.17      | 14.58        | -          | -            | 8.50         | 10.86            | 9.98      |
| Solar 10 Minutes   | 65.07      | 65.75        | -          | -            | 154.38       | 30.20            | 65.09     |
| Solar Weekly       | 24.59      | 24.76        | -          | -            | 19.05        | 17.87            | 21.65     |
| Sunspot            | 192.36     | 192.36       | 192.36     | 172.80       | -            | -                | 190.14    |
| M1 Yearly          | 23.08      | 20.16        | 18.60      | 19.46        | -            | -                | 18.77     |
| M1 Quarterly       | 18.07      | 16.33        | 17.41      | 16.59        | -            | -                | 16.64     |
| M1 Monthly         | 17.12      | 15.53        | 14.64      | 15.26        | -            | -                | 14.85     |
| M3 Yearly          | 17.76      | 16.76        | 17.00      | 18.84        | -            | -                | 17.13     |
| M3 Quarterly       | 10.90      | 9.20         | 9.68       | 10.24        | -            | -                | 9.77      |
| M3 Monthly         | 16.22      | 13.86        | 14.14      | 14.24        | -            | -                | 15.17     |
| M3 Other           | 6.28       | 4.92         | 4.37       | 4.35         | -            | -                | 5.32      |
| M4 Yearly          | 16.40      | 14.56        | 15.36      | 16.03        | -            | -                | 14.53     |
| M4 Quarterly       | 11.08      | 10.31        | 10.29      | 10.52        | -            | -                | 10.83     |
| M4 Monthly         | 14.38      | 13.01        | 13.52      | 13.08        | -            | -                | 13.73     |
| M4 Weekly          | 9.01       | 7.83         | -          | -            | 7.30         | 7.94             | 7.43      |
| M4 Daily           | 3.04       | 3.07         | 3.13       | 3.01         | -            | -                | 3.06      |
| M4 Hourly          | 42.92      | 42.94        | -          | -            | 28.10        | 35.94            | 11.67     |
| Pedestrian Counts  | 121.39     | 122.08       | -          | -            | 119.76       | 138.58           | 40.29     |
| KDD Cup            | 61.68      | 61.80        | -          | -            | 55.91        | 85.32            | 50.33     |
| Carparts           | 64.88      | 59.27        | 65.76      | 65.61        | -            | -                | 43.23     |
| Hospital           | 17.94      | 17.27        | 17.46      | 17.79        | -            | -                | 17.56     |
| Covid Deaths       | 15.35      | 15.57        | 8.64       | 9.26         | -            | -                | 18.34     |
| FRED-MD            | 8.72       | 9.72         | 8.40       | 7.98         | -            | -                | 30.77     |
| Dominick           | 72.94      | 114.89       | -          | -            | 112.76       | 136.72           | 68.44     |
| Weather            | 50.85      | 56.19        | 51.47      | 57.98        | -            | -                | 106.01    |

Table 10: Median msMAPE results

| Dataset            | SES    | Theta  | ETS    | ARIMA  | TBATS  | DHR-ARIMA | PR     |
|--------------------|--------|--------|--------|--------|--------|-----------|--------|
| NN5 Daily          | 34.57  | 20.51  | 20.31  | 22.72  | -      | -         | 28.70  |
| NN5 Weekly         | 10.94  | 10.96  | -      | -      | 10.97  | 11.08     | 10.50  |
| CIF 2016           | 11.40  | 7.95   | 6.58   | 7.69   | -      | -         | 8.43   |
| US Births          | 11.77  | 5.82   | 4.05   | 5.17   | -      | -         | 5.75   |
| Saugeen River Flow | 35.99  | 35.97  | 67.50  | 37.55  | -      | -         | 45.32  |
| Elecdemand         | 10.85  | 10.84  | -      | -      | 11.70  | 8.42      | 10.38  |
| Kaggle Daily       | 37.02  | 37.69  | 46.19  | 35.16  | -      | -         | -      |
| Kaggle Weekly      | 32.52  | 33.01  | -      | -      | 29.31  | 46.41     | 73.32  |
| Tourism Yearly     | 18.77  | 16.83  | 19.04  | 22.57  | -      | -         | 16.88  |
| Tourism Quarterly  | 22.48  | 13.17  | 12.89  | 13.13  | -      | -         | 13.33  |
| Tourism Monthly    | 30.24  | 17.40  | 17.16  | 18.00  | -      | -         | 18.47  |
| Traffic Hourly     | 8.26   | 8.26   | -      | -      | 7.58   | 10.66     | 5.43   |
| Traffic Weekly     | 9.66   | 9.71   | -      | -      | 10.01  | 10.48     | 9.69   |
| Electricity Hourly | 42.08  | 42.20  | -      | -      | 23.22  | 38.30     | 24.78  |
| Electricity Weekly | 12.22  | 11.72  | -      | -      | 6.17   | 6.97      | 7.41   |
| Solar 10 Minutes   | 64.68  | 65.26  | -      | -      | 152.54 | 30.26     | 64.68  |
| Solar Weekly       | 24.76  | 24.90  | -      | -      | 18.36  | 17.64     | 21.77  |
| Sunspot            | 192.36 | 192.36 | 192.36 | 172.80 | -      | -         | 190.14 |
| M1 Yearly          | 17.14  | 14.74  | 12.99  | 11.99  | -      | -         | 13.49  |
| M1 Quarterly       | 11.23  | 8.63   | 8.40   | 9.66   | -      | -         | 10.13  |
| M1 Monthly         | 14.24  | 11.18  | 10.80  | 11.48  | -      | -         | 11.79  |
| M3 Yearly          | 12.44  | 11.54  | 11.52  | 12.37  | -      | -         | 12.92  |
| M3 Quarterly       | 6.74   | 5.23   | 5.53   | 6.36   | -      | -         | 5.73   |
| M3 Monthly         | 10.71  | 9.25   | 9.13   | 9.01   | -      | -         | 10.39  |
| M3 Other           | 4.62   | 2.88   | 2.23   | 2.19   | -      | -         | 3.42   |
| M4 Yearly          | 11.41  | 9.23   | 8.97   | 10.20  | -      | -         | 9.49   |
| M4 Quarterly       | 6.94   | 6.06   | 5.61   | 5.80   | -      | -         | 6.34   |
| M4 Monthly         | 8.38   | 7.24   | 7.00   | 7.13   | -      | -         | 8.20   |
| M4 Weekly          | 5.17   | 5.19   | -      | -      | 4.81   | 5.10      | 4.99   |
| M4 Daily           | 1.99   | 2.01   | 1.99   | 2.01   | -      | -         | 2.00   |
| M4 Hourly          | 19.86  | 19.75  | -      | -      | 6.55   | 32.08     | 5.80   |
| Pedestrian Counts  | 121.41 | 124.44 | -      | -      | 118.52 | 142.71    | 36.46  |
| KDD Cup            | 60.18  | 60.23  | -      | -      | 53.98  | 84.90     | 52.77  |
| Carparts           | 45.45  | 45.45  | 46.18  | 46.18  | -      | -         | 30.30  |
| Hospital           | 16.57  | 15.90  | 16.11  | 16.75  | -      | -         | 16.12  |
| Covid Deaths       | 2.68   | 6.10   | 1.38   | 1.94   | -      | -         | 16.99  |
| FRED-MD            | 1.58   | 1.53   | 1.54   | 1.57   | -      | -         | 29.09  |
| Dominick           | 41.90  | 130.16 | -      | -      | 137.87 | 164.14    | 0.00   |
| Weather            | 22.26  | 22.31  | 23.59  | 23.00  | -      | -         | 119.15 |

Table 11: Mean MAE results

| Dataset            | SES       | Theta     | ETS       | ARIMA     | TBATS    | DHR-ARIMA | PR        |
|--------------------|-----------|-----------|-----------|-----------|----------|-----------|-----------|
| NN5 Daily          | 6.63      | 3.80      | 3.72      | 4.41      | -        | -         | 5.47      |
| NN5 Weekly         | 15.66     | 15.30     | -         | -         | 14.98    | 15.38     | 14.94     |
| CIF 2016           | 581875.97 | 714818.58 | 642421.42 | 469059.49 | -        | -         | 563205.57 |
| US Births          | 1192.20   | 586.93    | 419.73    | 526.33    | -        | -         | 574.93    |
| Saugeen River Flow | 21.50     | 21.49     | 30.69     | 22.38     | -        | -         | 25.24     |
| Elecdemand         | 0.42      | 0.42      | -         | -         | 0.47     | 0.33      | 0.43      |
| Kaggle Daily       | 363.43    | 358.73    | 403.23    | 340.36    | -        | -         | -         |
| Kaggle Weekly      | 2337.11   | 2373.98   | -         | -         | 2241.84  | 3115.03   | 4051.75   |
| Tourism Yearly     | 95579.23  | 90653.60  | 94818.89  | 95033.24  | -        | -         | 82682.97  |
| Tourism Quarterly  | 15014.19  | 7656.49   | 8925.52   | 10475.47  | -        | -         | 9092.58   |
| Tourism Monthly    | 5302.10   | 2069.96   | 2004.51   | 2536.77   | -        | -         | 2187.28   |
| Traffic Hourly     | 0.03      | 0.03      | -         | -         | 0.04     | 0.04      | 0.02      |
| Traffic Weekly     | 1.12      | 1.13      | -         | -         | 1.17     | 1.22      | 1.13      |
| Electricity Hourly | 845.97    | 846.03    | -         | -         | 574.30   | 868.20    | 537.38    |
| Electricity Weekly | 74149.18  | 74111.14  | -         | -         | 24347.24 | 28457.18  | 44882.52  |
| Solar 10 Minutes   | 3.28      | 3.29      | -         | -         | 8.77     | 2.37      | 3.28      |
| Solar Weekly       | 1202.39   | 1210.83   | -         | -         | 908.65   | 839.88    | 1044.98   |
| Sunspot            | 4.93      | 4.93      | 4.93      | 2.57      | -        | -         | 3.83      |
| M1 Yearly          | 171353.41 | 152799.26 | 146110.11 | 145608.87 | -        | -         | 134246.38 |
| M1 Quarterly       | 2206.27   | 1981.96   | 2088.15   | 2191.10   | -        | -         | 1630.38   |
| M1 Monthly         | 2259.04   | 2166.18   | 1905.28   | 2080.13   | -        | -         | 2088.25   |
| M3 Yearly          | 1022.27   | 957.40    | 1031.40   | 1416.31   | -        | -         | 1018.48   |
| M3 Quarterly       | 571.96    | 486.31    | 513.06    | 559.40    | -        | -         | 519.30    |
| M3 Monthly         | 743.41    | 623.71    | 626.46    | 654.80    | -        | -         | 692.97    |
| M3 Other           | 277.83    | 215.35    | 194.98    | 193.02    | -        | -         | 234.43    |
| M4 Yearly          | 1009.06   | 890.51    | 920.66    | 1067.16   | -        | -         | 875.76    |
| M4 Quarterly       | 622.57    | 574.34    | 573.19    | 604.51    | -        | -         | 610.51    |
| M4 Monthly         | 625.24    | 563.58    | 582.60    | 575.36    | -        | -         | 596.19    |
| M4 Weekly          | 336.82    | 333.32    | -         | -         | 296.15   | 321.61    | 293.21    |
| M4 Daily           | 178.27    | 178.86    | 193.26    | 179.67    | -        | -         | 181.92    |
| M4 Hourly          | 1218.06   | 1220.97   | -         | -         | 386.27   | 1310.85   | 257.39    |
| Pedestrian Counts  | 170.87    | 170.94    | -         | -         | 222.38   | 635.16    | 44.18     |
| KDD Cup            | 42.04     | 42.06     | -         | -         | 39.20    | 52.20     | 36.85     |
| Carparts           | 0.55      | 0.53      | 0.56      | 0.56      | -        | -         | 0.41      |
| Hospital           | 21.76     | 18.54     | 17.97     | 19.60     | -        | -         | 19.24     |
| Covid Deaths       | 353.71    | 321.32    | 85.59     | 85.77     | -        | -         | 347.98    |
| FRED-MD            | 2798.22   | 3492.84   | 2041.42   | 2957.11   | -        | -         | 8921.94   |
| Dominick           | 5.70      | 5.86      | -         | -         | 6.95     | 7.10      | 8.19      |
| Weather            | 2.24      | 2.51      | 2.35      | 2.45      | -        | -         | 8.17      |

Table 12: Median MAE results

| Dataset            | SES      | Theta    | ETS     | ARIMA   | TBATS   | DHR-ARIMA | PR      |
|--------------------|----------|----------|---------|---------|---------|-----------|---------|
| NN5 Daily          | 5.94     | 3.55     | 3.48    | 3.85    | -       | -         | 5.06    |
| NN5 Weekly         | 14.18    | 13.90    | -       | -       | 13.73   | 14.82     | 12.84   |
| CIF 2016           | 107.09   | 103.39   | 70.43   | 80.66   | -       | -         | 95.13   |
| US Births          | 1192.20  | 586.93   | 419.73  | 526.33  | -       | -         | 574.93  |
| Saugeen River Flow | 21.50    | 21.49    | 30.69   | 22.38   | -       | -         | 25.24   |
| Elecdemand         | 0.42     | 0.42     | -       | -       | 0.47    | 0.33      | 0.43    |
| Kaggle Daily       | 51.05    | 51.64    | 69.27   | 46.27   | -       | -         | -       |
| Kaggle Weekly      | 357.12   | 355.50   | -       | -       | 278.00  | 609.62    | 494.38  |
| Tourism Yearly     | 4312.77  | 4085.98  | 4271.06 | 4623.59 | -       | -         | 4340.90 |
| Tourism Quarterly  | 1921.00  | 1114.30  | 1003.24 | 1047.01 | -       | -         | 992.12  |
| Tourism Monthly    | 967.57   | 478.45   | 457.04  | 462.53  | -       | -         | 474.72  |
| Traffic Hourly     | 0.02     | 0.02     | -       | -       | 0.02    | 0.03      | 0.02    |
| Traffic Weekly     | 0.92     | 0.92     | -       | -       | 0.94    | 0.98      | 0.93    |
| Electricity Hourly | 210.20   | 210.20   | -       | -       | 127.05  | 215.60    | 137.88  |
| Electricity Weekly | 10983.75 | 10447.12 | -       | -       | 6149.88 | 6789.75   | 7090.88 |
| Solar 10 Minutes   | 2.92     | 2.92     | -       | -       | 5.64    | 2.13      | 2.92    |
| Solar Weekly       | 1091.23  | 1103.20  | -       | -       | 780.04  | 760.63    | 942.23  |
| Sunspot            | 4.93     | 4.93     | 4.93    | 2.57    | -       | -         | 3.83    |
| M1 Yearly          | 379.28   | 255.75   | 191.24  | 179.98  | -       | -         | 245.67  |
| M1 Quarterly       | 22.30    | 19.55    | 19.59   | 16.23   | -       | -         | 19.19   |
| M1 Monthly         | 45.33    | 38.23    | 38.51   | 40.54   | -       | -         | 37.37   |
| M3 Yearly          | 703.33   | 660.49   | 641.07  | 701.32  | -       | -         | 711.86  |
| M3 Quarterly       | 371.95   | 294.16   | 304.53  | 333.74  | -       | -         | 325.44  |
| M3 Monthly         | 517.09   | 420.80   | 408.92  | 412.47  | -       | -         | 479.18  |
| M3 Other           | 164.13   | 104.93   | 83.64   | 77.02   | -       | -         | 127.12  |
| M4 Yearly          | 529.96   | 428.94   | 427.24  | 493.19  | -       | -         | 456.65  |
| M4 Quarterly       | 318.93   | 274.24   | 250.82  | 262.40  | -       | -         | 295.64  |
| M4 Monthly         | 291.89   | 249.73   | 244.21  | 243.12  | -       | -         | 280.83  |
| M4 Weekly          | 219.63   | 210.47   | -       | -       | 163.68  | 188.39    | 176.01  |
| M4 Daily           | 92.14    | 91.85    | 92.16   | 92.18   | -       | -         | 92.28   |
| M4 Hourly          | 49.20    | 49.21    | -       | -       | 33.77   | 30.75     | 14.21   |
| Pedestrian Counts  | 67.40    | 67.52    | -       | -       | 131.83  | 448.38    | 17.02   |
| KDD Cup            | 27.75    | 27.74    | -       | -       | 22.25   | 31.06     | 18.00   |
| Carparts           | 0.33     | 0.25     | 0.33    | 0.33    | -       | -         | 0.25    |
| Hospital           | 6.67     | 6.67     | 6.67    | 6.83    | -       | -         | 6.67    |
| Covid Deaths       | 2.23     | 4.42     | 1.65    | 1.78    | -       | -         | 6.77    |
| FRED-MD            | 1.89     | 1.94     | 2.35    | 2.73    | -       | -         | 41.36   |
| Dominick           | 0.89     | 1.25     | -       | -       | 5.05    | 3.66      | 0.00    |
| Weather            | 2.17     | 2.18     | 2.27    | 2.23    | -       | -         | 7.89    |

Table 13: Mean RMSE results

| Dataset            | SES       | Theta     | ETS       | ARIMA     | TBATS    | DHR-ARIMA | PR        |
|--------------------|-----------|-----------|-----------|-----------|----------|-----------|-----------|
| NN5 Daily          | 8.23      | 5.28      | 5.22      | 6.05      | -        | -         | 7.26      |
| NN5 Weekly         | 18.82     | 18.65     | -         | -         | 18.53    | 18.55     | 18.62     |
| CIF 2016           | 657112.42 | 804654.19 | 722397.37 | 526395.02 | -        | -         | 648890.31 |
| US Births          | 1369.50   | 735.51    | 607.20    | 705.51    | -        | -         | 732.09    |
| Saugeen River Flow | 39.79     | 39.79     | 50.39     | 43.23     | -        | -         | 47.70     |
| Elecdemand         | 0.51      | 0.51      | -         | -         | 0.59     | 0.43      | 0.53      |
| Kaggle Daily       | 590.11    | 583.32    | 650.43    | 595.43    | -        | -         | -         |
| Kaggle Weekly      | 2970.78   | 3012.39   | -         | -         | 2951.87  | 3777.28   | 4750.26   |
| Tourism Yearly     | 106665.20 | 99914.21  | 104700.51 | 106082.60 | -        | -         | 89645.61  |
| Tourism Quarterly  | 17270.57  | 9254.63   | 10812.34  | 12564.77  | -        | -         | 11746.85  |
| Tourism Monthly    | 7039.35   | 2701.96   | 2542.96   | 3132.40   | -        | -         | 2739.43   |
| Traffic Hourly     | 0.04      | 0.04      | -         | -         | 0.05     | 0.04      | 0.03      |
| Traffic Weekly     | 1.51      | 1.53      | -         | -         | 1.53     | 1.54      | 1.50      |
| Electricity Hourly | 1026.29   | 1026.36   | -         | -         | 743.35   | 1082.44   | 689.85    |
| Electricity Weekly | 77067.87  | 76935.58  | -         | -         | 28039.73 | 32594.81  | 47802.08  |
| Solar 10 Minutes   | 7.23      | 7.23      | -         | -         | 10.71    | 5.55      | 7.23      |
| Solar Weekly       | 1331.26   | 1341.55   | -         | -         | 1049.01  | 967.87    | 1168.18   |
| Sunspot            | 4.95      | 4.95      | 4.95      | 2.96      | -        | -         | 3.95      |
| M1 Yearly          | 193829.49 | 171458.07 | 167739.02 | 175343.75 | -        | -         | 152038.68 |
| M1 Quarterly       | 2545.73   | 2282.65   | 2408.47   | 2538.45   | -        | -         | 1909.31   |
| M1 Monthly         | 2725.83   | 2564.88   | 2263.96   | 2450.61   | -        | -         | 2478.88   |
| M3 Yearly          | 1172.85   | 1106.05   | 1189.21   | 1662.17   | -        | -         | 1181.81   |
| M3 Quarterly       | 670.56    | 567.70    | 598.73    | 650.76    | -        | -         | 605.50    |
| M3 Monthly         | 893.88    | 753.99    | 755.26    | 790.76    | -        | -         | 830.04    |
| M3 Other           | 309.68    | 242.13    | 224.08    | 220.77    | -        | -         | 262.31    |
| M4 Yearly          | 1154.49   | 1020.48   | 1052.12   | 1230.35   | -        | -         | 1000.18   |
| M4 Quarterly       | 732.82    | 673.15    | 674.27    | 709.99    | -        | -         | 711.93    |
| M4 Monthly         | 755.45    | 683.72    | 705.70    | 702.06    | -        | -         | 720.46    |
| M4 Weekly          | 412.60    | 405.17    | -         | -         | 356.74   | 386.30    | 350.29    |
| M4 Daily           | 209.75    | 210.37    | 229.97    | 212.64    | -        | -         | 213.01    |
| M4 Hourly          | 1476.81   | 1483.70   | -         | -         | 469.87   | 1563.05   | 312.98    |
| Pedestrian Counts  | 228.14    | 228.20    | -         | -         | 261.25   | 820.28    | 61.84     |
| KDD Cup            | 73.81     | 73.83     | -         | -         | 71.21    | 82.66     | 68.20     |
| Carparts           | 0.78      | 0.78      | 0.80      | 0.81      | -        | -         | 0.73      |
| Hospital           | 26.55     | 22.59     | 22.02     | 23.68     | -        | -         | 23.48     |
| Covid Deaths       | 403.41    | 370.14    | 102.08    | 100.46    | -        | -         | 394.07    |
| FRED-MD            | 3103.00   | 3898.72   | 2341.72   | 3312.46   | -        | -         | 9736.93   |
| Dominick           | 6.48      | 6.74      | -         | -         | 8.12     | 7.96      | 9.44      |
| Weather            | 2.85      | 3.27      | 2.96      | 3.07      | -        | -         | 9.08      |



Table 14: Median RMSE results

| Dataset            | SES      | Theta    | ETS     | ARIMA   | TBATS   | DHR-ARIMA | PR      |
|--------------------|----------|----------|---------|---------|---------|-----------|---------|
| NN5 Daily          | 7.46     | 4.95     | 4.86    | 5.42    | -       | -         | 6.80    |
| NN5 Weekly         | 17.52    | 16.82    | -       | -       | 16.99   | 17.49     | 16.26   |
| CIF 2016           | 129.06   | 118.29   | 85.77   | 103.14  | -       | -         | 109.09  |
| US Births          | 1369.50  | 735.51   | 607.20  | 705.51  | -       | -         | 732.09  |
| Saugeen River Flow | 39.79    | 39.79    | 50.39   | 43.23   | -       | -         | 47.70   |
| Elecdemand         | 0.51     | 0.51     | -       | -       | 0.59    | 0.43      | 0.53    |
| Kaggle Daily       | 74.58    | 75.16    | 98.97   | 68.13   | -       | -         | -       |
| Kaggle Weekly      | 424.02   | 429.71   | -       | -       | 346.60  | 707.60    | 576.40  |
| Tourism Yearly     | 4718.37  | 4615.95  | 4626.74 | 5174.76 | -       | -         | 4717.10 |
| Tourism Quarterly  | 2295.67  | 1392.89  | 1207.24 | 1196.05 | -       | -         | 1184.48 |
| Tourism Monthly    | 1250.26  | 675.10   | 598.88  | 603.66  | -       | -         | 596.26  |
| Traffic Hourly     | 0.03     | 0.03     | -       | -       | 0.03    | 0.04      | 0.02    |
| Traffic Weekly     | 1.20     | 1.22     | -       | -       | 1.21    | 1.21      | 1.19    |
| Electricity Hourly | 256.22   | 256.22   | -       | -       | 181.79  | 275.52    | 171.57  |
| Electricity Weekly | 12460.16 | 11805.76 | -       | -       | 7278.04 | 8268.55   | 8237.57 |
| Solar 10 Minutes   | 6.59     | 6.60     | -       | -       | 7.47    | 5.05      | 6.59    |
| Solar Weekly       | 1193.90  | 1214.27  | -       | -       | 885.59  | 878.01    | 1016.25 |
| Sunspot            | 4.95     | 4.95     | 4.95    | 2.96    | -       | -         | 3.95    |
| M1 Yearly          | 416.37   | 323.31   | 230.39  | 207.82  | -       | -         | 304.77  |
| M1 Quarterly       | 24.46    | 22.81    | 21.86   | 20.23   | -       | -         | 22.53   |
| M1 Monthly         | 54.67    | 46.40    | 44.39   | 47.11   | -       | -         | 45.35   |
| M3 Yearly          | 803.71   | 740.10   | 758.62  | 814.68  | -       | -         | 824.55  |
| M3 Quarterly       | 436.25   | 355.79   | 368.91  | 405.87  | -       | -         | 378.31  |
| M3 Monthly         | 633.56   | 516.79   | 495.97  | 497.97  | -       | -         | 582.04  |
| M3 Other           | 182.17   | 120.84   | 99.97   | 92.60   | -       | -         | 144.46  |
| M4 Yearly          | 610.38   | 497.80   | 494.90  | 567.70  | -       | -         | 525.42  |
| M4 Quarterly       | 378.29   | 322.60   | 297.17  | 310.08  | -       | -         | 346.99  |
| M4 Monthly         | 348.59   | 299.02   | 293.25  | 292.51  | -       | -         | 333.30  |
| M4 Weekly          | 262.04   | 242.14   | -       | -       | 197.26  | 224.55    | 223.12  |
| M4 Daily           | 108.04   | 108.55   | 108.77  | 108.40  | -       | -         | 108.48  |
| M4 Hourly          | 61.40    | 61.58    | -       | -       | 42.90   | 42.93     | 19.89   |
| Pedestrian Counts  | 88.65    | 88.76    | -       | -       | 155.94  | 627.43    | 22.09   |
| KDD Cup            | 30.66    | 30.64    | -       | -       | 25.60   | 40.08     | 22.37   |
| Carparts           | 0.71     | 0.65     | 0.71    | 0.71    | -       | -         | 0.58    |
| Hospital           | 8.26     | 8.20     | 8.25    | 8.45    | -       | -         | 8.25    |
| Covid Deaths       | 3.09     | 5.29     | 2.21    | 2.16    | -       | -         | 8.28    |
| FRED-MD            | 2.31     | 2.36     | 2.70    | 3.49    | -       | -         | 45.18   |
| Dominick           | 0.93     | 1.32     | -       | -       | 5.88    | 4.00      | 0.00    |
| Weather            | 2.67     | 2.68     | 2.76    | 2.76    | -       | -         | 8.74    |

## D Execution times

Table 15 shows the execution times corresponding with the traditional univariate forecasting models and the PR models across all datasets. Note that the *Univariate Models* column show the addition of ETS, ARIMA, SES and Theta execution times for yearly, quarterly, monthly and daily datasets, whereas it shows the addition of TBATS, DHR-ARIMA, SES and Theta execution times for weekly, hourly, half hourly and 10 minutes datasets.

The experiments are run on an Intel(R) Core(TM) i7-8700 processor (3.2GHz) and 65GB of main memory.

Table 15: Execution times of univariate and PR models

| Dataset            | Univariate Models | PR Model   |
|--------------------|-------------------|------------|
| NN5 Daily          | 16.11 mins        | 1.23 secs  |
| NN5 Weekly         | 5.92 mins         | 0.79 secs  |
| CIF 2016           | 1.85 mins         | 0.48 secs  |
| US Births          | 12.15 secs        | 0.06 secs  |
| Saugeen River Flow | 24.22 secs        | 0.14 secs  |
| Electricity demand | 1.83 mins         | 8.02 secs  |
| Kaggle Daily       | 8.79 days         | -          |
| Kaggle Weekly      | 4.12 days         | 1.04 days  |
| Tourism Yearly     | 37.07 secs        | 3.05 secs  |
| Tourism Quarterly  | 4.05 mins         | 2.70 secs  |
| Tourism Monthly    | 26.78 mins        | 3.30 secs  |
| Traffic Hourly     | 3.01 days         | 15.74 mins |
| Traffic Weekly     | 8.81 mins         | 8.43 secs  |
| Electricity Hourly | 1.78 days         | 3.07 mins  |
| Electricity Weekly | 12.25 mins        | 3.08 secs  |
| Solar 10 Minutes   | 21.99 hours       | 2.66 mins  |
| Solar Weekly       | 47.86 secs        | 1.70 secs  |
| Sunspot            | 3.74 mins         | 0.18 secs  |
| M1 Yearly          | 13.20 secs        | 1.13 secs  |
| M1 Quarterly       | 51.19 secs        | 2.56 secs  |
| M1 Monthly         | 18.01 mins        | 4.06 secs  |
| M3 Yearly          | 46.56 secs        | 3.78 secs  |
| M3 Quarterly       | 3.01 mins         | 4.61 secs  |
| M3 Monthly         | 56.97 mins        | 13.45 secs |
| M3 Other           | 7.81 secs         | 0.06 secs  |
| M4 Yearly          | 30.62 mins        | 5.93 mins  |
| M4 Quarterly       | 2.59 hours        | 18.81 mins |
| M4 Monthly         | 1.49 days         | 4.78 hours |
| M4 Weekly          | 42.84 mins        | 26.89 secs |
| M4 Daily           | 3.85 hours        | 15.31 mins |
| M4 Hourly          | 50.21 mins        | 57.47 secs |
| Pedestrian Counts  | 19.07 hours       | 7.18 mins  |
| KDD Cup            | 5.06 hours        | 9.93 mins  |
| Car Parts          | 21.54 mins        | 37.54 secs |
| Hospital           | 20.31 mins        | 9.69 secs  |
| COVID Deaths       | 20.03 mins        | 1.94 secs  |
| FRED-MD            | 7.51 mins         | 1.62 secs  |
| Dominick           | 1.12 days         | 8.42 hours |
| Weather            | 1.34 days         | 51.55 mins |

## References

- [1] G. Lai, W.-C. Chang, Y. Yang, and H. Liu. Modeling long- and short-term temporal patterns with deep neural networks. In *The 41st International ACM SIGIR Conference on Research and Development in Information Retrieval*, page 95–104, New York, NY, USA, 2018.
- [2] Kaggle. <https://www.kaggle.com/>, 2019.
- [3] Center for Systems Science and Engineering at Johns Hopkins University. COVID-19 data repository. <https://github.com/CSSEGISandData/COVID-19>, 2020.
- [4] S. Makridakis, A. Andersen, R. F. Carbone, R. Fildes, M. Hibon, R. Lewandowski, J. Newton, E. Parzen, and R. L. Winkler. The accuracy of extrapolation (time series) methods: results of a forecasting competition. *Journal of Forecasting*, 1(2):111–153, 1982.
- [5] G. Zhang, B. E. Patuwo, and M. Y. Hu. Forecasting with artificial neural networks:: the state of the art. *International Journal of Forecasting*, 14(1):35–62, 1998.
- [6] G. P. Zhang. Time series forecasting using a hybrid arima and neural network model. *Neuro-computing*, 50:159 – 175, 2003. ISSN 0925-2312.

- [7] R. J. Hyndman and Y. Khandakar. Automatic time series forecasting: the forecast package for R. *Journal of Statistical Software*, 27(3):1–22, 2008. URL <http://www.jstatsoft.org/v27/i03>.
- [8] E. S. Gardner. Exponential smoothing: the state of the art. *Journal of Forecasting*, 4(1):1–28, 1985.
- [9] G. P. Zhang and M. Qi. Neural network forecasting for seasonal and trend time series. *European Journal of Operational Research*, 160(2):501 – 514, 2005. ISSN 0377-2217.
- [10] S. Makridakis and M. Hibon. The M3-competition: results, conclusions and implications. *International Journal of Forecasting*, 16(4):451–476, 2000.
- [11] V. Assimakopoulos and K. Nikolopoulos. The theta model: a decomposition approach to forecasting. *International Journal of Forecasting*, 16(4):521–530, 2000.
- [12] H. Hewamalage, C. Bergmeir, and K. Bandara. Recurrent neural networks for time series forecasting: current status and future directions. *International Journal of Forecasting*, 2021.
- [13] R. Godahewa, K. Bandara, G. I. Webb, S. Smyl, and C. Bergmeir. Ensembles of localised models for time series forecasting. <https://arxiv.org/abs/2012.15059>, 2020.
- [14] L. J. Tashman. Out-of-sample tests of forecasting accuracy: an analysis and review. *International Journal of Forecasting*, 16(4):437 – 450, 2000. ISSN 0169-2070.
- [15] A. Saxena, J. Celaya, E. Balaban, K. Goebel, B. Saha, S. Saha, and M. Schwabacher. Metrics for evaluating performance of prognostic techniques. In *2008 International Conference on Prognostics and Health Management*, pages 1–17, 2008.
- [16] D. M. Dunlavy, T. G. Kolda, and E. Acar. Temporal link prediction using matrix and tensor factorizations. *ACM Trans. Knowl. Discov. Data*, 5(2), February 2011. ISSN 1556-4681.
- [17] A. M. De Livera, R. J. Hyndman, and R. D. Snyder. Forecasting time series with complex seasonal patterns using exponential smoothing. *Journal of the American Statistical Association*, 106(496):1513–1527, 2011.
- [18] J. S. Armstrong. *Evaluating Forecasting Methods*, pages 443–472. Springer US, Boston, MA, 2001. ISBN 978-0-306-47630-3.
- [19] J. W. Taylor. Exponential smoothing with a damped multiplicative trend. *International Journal of Forecasting*, 19(4):715–725, 2003.
- [20] S. Makridakis, E. Spiliotis, and V. Assimakopoulos. The M4 competition: results, findings, conclusion and way forward. *International Journal of Forecasting*, 34(4):802–808, 2018.
- [21] S. Makridakis, E. Spiliotis, and V. Assimakopoulos. The M4 competition: 100,000 time series and 61 forecasting methods. *International Journal of Forecasting*, 36(1):54 – 74, 2020. ISSN 0169-2070.
- [22] Forecasting & Strategy Unit. Foredeck. <http://fsudataset.com/>, 2019.
- [23] S. Smyl. A hybrid method of exponential smoothing and recurrent neural networks for time series forecasting. *International Journal of Forecasting*, 36(1):75–85, 2020.
- [24] P. Montero-Manso, G. Athanasopoulos, R. J. Hyndman, and T. S. Talagala. FFORMA: feature-based forecast model averaging. *International Journal of Forecasting*, 36(1):86–92, 2020.
- [25] K. Bandara, C. Bergmeir, and H. Hewamalage. LSTM-MSNet: leveraging forecasts on sets of related time series with multiple seasonal patterns. *IEEE Transactions on Neural Networks and Learning Systems*, 2019.
- [26] E. Spiliotis, A. Kouloumos, V. Assimakopoulos, and S. Makridakis. Are forecasting competitions data representative of the reality? *International Journal of Forecasting*, 36(1):37 – 53, 2020. ISSN 0169-2070.

- [27] R. L. Winkler, Y. Grushka-Cockayne, K. C. Lichtendahl, and V. R. R. Jose. Averaging probability forecasts: back to the future. 2018.
- [28] R. Godahewa, C. Bergmeir, G. I. Webb, and P. Montero-Manso. A strong baseline for weekly time series forecasting. <https://arxiv.org/abs/2010.08158>, 2020.
- [29] G. Athanasopoulos, R. J. Hyndman, H. Song, and D. C. Wu. The tourism forecasting competition. *International Journal of Forecasting*, 27(3):822–844, 2011.
- [30] P. Ellis. Tcomp: data from the 2010 tourism forecasting competition. <https://cran.r-project.org/web/packages/Tcomp>, 2018.
- [31] B. Peng, H. Song, and G. I. Crouch. A meta-analysis of international tourism demand forecasting and implications for practice. *Tourism Management*, 45:181 – 193, 2014. ISSN 0261-5177.
- [32] N. Kourentzes, F. Petropoulos, and J. R. Trapero. Improving forecasting by estimating time series structural components across multiple frequencies. *International Journal of Forecasting*, 30(2):291 – 302, 2014. ISSN 0169-2070.
- [33] H. Song, G. Li, S. F. Witt, and G. Athanasopoulos. Forecasting tourist arrivals using time-varying parameter structural time series models. *International Journal of Forecasting*, 27(3):855 – 869, 2011. ISSN 0169-2070.
- [34] M. Theodosiou. Forecasting monthly and quarterly time series using STL decomposition. *International Journal of Forecasting*, 27(4):1178 – 1195, 2011. ISSN 0169-2070.
- [35] M. Akin. A novel approach to model selection in tourism demand modeling. *Tourism Management*, 48:64 – 72, 2015. ISSN 0261-5177.
- [36] S. Ben Taieb, G. Bontempi, A. F. Atiya, and A. Sorjamaa. A review and comparison of strategies for multi-step ahead time series forecasting based on the NN5 forecasting competition. *Expert Systems with Applications*, 39(8):7067 – 7083, 2012.
- [37] K. Bandara, C. Bergmeir, and S. Smyl. Forecasting across time series databases using recurrent neural networks on groups of similar series: a clustering approach. *Expert Syst. Appl.*, 140:112896, 2020. ISSN 0957-4174.
- [38] R. R. Andrawis, A. F. Atiya, and H. El-Shishiny. Forecast combinations of computational intelligence and linear models for the NN5 time series forecasting competition. *International Journal of Forecasting*, 27(3):672 – 688, 2011. ISSN 0169-2070.
- [39] J. D. Wichard. Forecasting the NN5 time series with hybrid models. *International Journal of Forecasting*, 27(3):700 – 707, 2011. ISSN 0169-2070.
- [40] S. Ben Taieb, A. Sorjamaa, and G. Bontempi. Multiple-output modeling for multi-step-ahead time series forecasting. *Neurocomputing*, 73(10):1950 – 1957, 2010. ISSN 0925-2312.
- [41] S. Ben Taieb and G. Bontempi. Recursive multi-step time series forecasting by perturbing data. In *2011 IEEE 11th International Conference on Data Mining*, pages 695–704, 2011.
- [42] U. Pritzsche. *Benchmarking of Classical and Machine-Learning Algorithms (with special emphasis on Bagging and Boosting Approaches) for Time Series Forecasting*. PhD thesis, 2015.
- [43] M. Štěpnička and M. Burda. On the results and observations of the time series forecasting competition CIF 2016. In *2017 IEEE International Conference on Fuzzy Systems (FUZZ-IEEE)*, pages 1–6, 2017.
- [44] T. M. Dantas and F. L. C. Oliveira. Improving time series forecasting: an approach combining bootstrap aggregation, clusters and exponential smoothing. *International Journal of Forecasting*, 34(4):748 – 761, 2018. ISSN 0169-2070.
- [45] T. Afanasieva, N. Yarushkina, and I. Sibirev. Time series clustering using numerical and fuzzy representations. In *2017 Joint 17th World Congress of International Fuzzy Systems Association and 9th International Conference on Soft Computing and Intelligent Systems (IFSA-SCIS)*, pages 1–7, 2017.

- [46] V. N. Coelho, I. M. Coelho, I. R. Meneghini, M. J. F. Souza, and F. G. Guimarães. An automatic calibration framework applied on a metaheuristic fuzzy model for the cif competition. In *2016 International Joint Conference on Neural Networks (IJCNN)*, pages 1507–1514, 2016.
- [47] Google. Web traffic time series forecasting, 2017. URL <https://www.kaggle.com/c/web-traffic-time-series-forecasting>.
- [48] N. Petluri and E. Al-Masri. Web traffic prediction of wikipedia pages. In *2018 IEEE International Conference on Big Data (Big Data)*, pages 5427–5429, 2018.
- [49] M. Gupta, A. Asthana, N. Joshi, and P. Mehndiratta. Improving time series forecasting using mathematical and deep learning models. In A. Mondal, H. Gupta, J. Srivastava, P. K. Reddy, and D. V. L. N. Somayajulu, editors, *Big Data Analytics*, pages 115–125, Cham, 2018. Springer International Publishing. ISBN 978-3-030-04780-1.
- [50] Z. Mariet and V. Kuznetsov. Foundations of sequence-to-sequence modeling for time series. In K. Chaudhuri and M. Sugiyama, editors, *Proceedings of Machine Learning Research*, volume 89 of *Proceedings of Machine Learning Research*, pages 408–417. PMLR, April 2019.
- [51] Solar. Solar power data for integration studies, national renewable energy laboratory, 2020. URL <https://www.nrel.gov/grid/solar-power-data.html>.
- [52] UCI. Electricityloadaddiagrams20112014 data set, UCI machine learning repository, 2020. URL <https://archive.ics.uci.edu/ml/datasets/ElectricityLoadDiagrams20112014>.
- [53] D. Jean-Michel. Smart meter data from London area, 2019. URL <https://www.kaggle.com/jeanmidev/smart-meters-in-london>.
- [54] A. Nugaliyadde, U. V. Somaratne, and K. W. Wong. Predicting electricity consumption using deep recurrent neural networks. *ArXiv*, abs/1909.08182, 2019.
- [55] A. M. Alonso, F. J. Nogales, and C. Ruiz. A single scalable lstm model for short-term forecasting of disaggregated electricity loads. *ArXiv*, abs/1910.06640, 2019.
- [56] M. Maksut, A. Karbozov, M. Myrzaliyeva, H. S. V. S. K. Nunna, P. K. Jamwal, and S. Doolla. Deep learning based short- term load forecasting for urban areas. In *2019 IEEE Industry Applications Society Annual Meeting*, pages 1–6, 2019.
- [57] D. Kaur, R. Kumar, N. Kumar, and M. Guizani. Smart grid energy management using RNN-LSTM: a deep learning-based approach. In *2019 IEEE Global Communications Conference (GLOBECOM)*, pages 1–6, 2019.
- [58] AEMO. Market data nemweb. <http://www.nemweb.com.au/>, 2020.
- [59] R. J. Hyndman. expsmooth: data sets from forecasting with exponential smoothing. <https://cran.r-project.org/web/packages/expsmooth>, 2015.
- [60] P. Montero-Manso and R. J. Hyndman. Principles and algorithms for forecasting groups of time series: locality and globality. *International Journal of Forecasting*, 2021. URL <https://arxiv.org/abs/2008.00444>. to appear.
- [61] James M. Kilts Center. Dominick’s dataset. <https://www.chicagobooth.edu/research/kilts/datasets/dominicks>, 2020.
- [62] T. Huang, R. Fildes, and D. Soopramanien. The value of competitive information in forecasting fmcg retail product sales and the variable selection problem. *European Journal of Operational Research*, 237(2):738 – 748, 2014. ISSN 0377-2217.
- [63] D. Toro-González, J. J. McCluskey, and R. Mittelhammer. Beer snobs do exist: estimation of beer demand by type. *Journal of Agricultural and Resource Economics*, 39(2):174–187, 2014.
- [64] A. Jami and H. Mishra. Downsizing and supersizing: how changes in product attributes influence consumer preferences. *Journal of Behavioral Decision Making*, 27(4):301–315, January 2014. ISSN 0894-3257.

- [65] M. Eichenbaum, N. Jaimovich, and S. Rebelo. Reference prices, costs, and nominal rigidities. *American Economic Review*, 101(1):234–262, February 2011.
- [66] B. Guimaraes and K. D. Sheedy. Sales and monetary policy. *American Economic Review*, 101(2):844–76, April 2011.
- [67] M. W. McCracken and S. Ng. FRED-MD: a monthly database for macroeconomic research. *Journal of Business and Economic Statistics*, 34(4):574–589, 2016.
- [68] Caltrans. Caltrans performance measurement system, California department of transportation, 2020. URL <http://pems.dot.ca.gov>.
- [69] City of Melbourne. Pedestrian counting system – 2009 to present (counts per hour), 2017. URL <https://data.melbourne.vic.gov.au/Transport/Pedestrian-Counting-System-2009-to-Present-counts-/b2ak-trbp>.
- [70] E. Carter, P. Adam, D. Tsakis, S. Shaw, R. Watson, and P. Ryan. Enhancing pedestrian mobility in smart cities using big data. *Journal of Management Analytics*, 7(2):173–188, 2020.
- [71] H. O. Obie, C. Chua, I. Avazpour, M. Abdelrazek, and J. Grundy. Visualising melbourne pedestrian count. In *2017 IEEE Symposium on Visual Languages and Human-Centric Computing (VL/HCC)*, pages 343–344, 2017.
- [72] H. O. Obie, C. Chua, I. Avazpour, M. Abdelrazek, J. Grundy, and T. Bednarz. Pedaviz: visualising hour-level pedestrian activity. In *Proceedings of the 11th International Symposium on Visual Information Communication and Interaction, VINCI ’18*, page 9–16, New York, NY, USA, 2018. Association for Computing Machinery. ISBN 9781450365017.
- [73] E. Dong, H. Du., and L. Gardner. An interactive web-based dashboard to track COVID-19 in real time. *Lancet Inf Dis.*, 20(5):533–534, 2020.
- [74] KDD2018. Kdd cup 2018, 2018. URL <https://www.kdd.org/kdd2018/kdd-cup>.
- [75] Z. Luo, J. Huang, K. Hu, X. Li, and P. Zhang. AccuAir: winning solution to air quality prediction for kdd cup 2018. In *Proceedings of the 25th ACM SIGKDD International Conference on Knowledge Discovery and Data Mining, KDD ’19*, page 1842–1850, New York, NY, USA, 2019. Association for Computing Machinery. ISBN 9781450362016.
- [76] A. H. Sparks, J. Carroll, J. Goldie, D. Marchiori, P. Melloy, M. Padgham, H. Parsonage, and K. Pembleton. *bomrang: Australian Government Bureau of Meteorology (BOM) Data Client*, 2020. URL <https://CRAN.R-project.org/package=bomrang>.
- [77] Sunspot. Sunspot number version 2.0: new data and conventions, 2015. URL <http://www.sidc.be/silso/newdataset>.
- [78] A. Gkana and L. Zachilas. Re-evaluation of predictive models in light of new data: sunspot number version 2.0. *Solar Physics*, 291, August 2016.
- [79] L. Bertello, A. Pevtsov, A. Tlatov, and J. Singh. Correlation between sunspot number and ca ii k emission index. *Solar Physics*, 291, June 2016.
- [80] A. Shapoval, J. Le Mouel, M. Shnirman, and V. Courtillot. Dynamics of sunspot series on time scales from days to years: correlation of sunspot births, variable lifetimes, and evolution of the high-frequency spectral component. *Journal of Geophysical Research: Space Physics*, 122, December 2017.
- [81] G. Pease and G. Glenn. Long term sunspot cycle phase coherence with periodic phase disruptions. October 2016.
- [82] A. I. McLeod and H. Gweon. Optimal deseasonalization for monthly and daily geophysical time series. *Journal of Environmental Statistics*, 4(11), 2013. URL <http://www.jenvstat.org/v04/i11>.

- 603 [83] A. Bauer, M. Züfle, N. Herbst, S. Kounev, and V. Curtef. Telescope: an automatic feature  
604 extraction and transformation approach for time series forecasting on a level-playing field. In  
605 *2020 IEEE 36th International Conference on Data Engineering (ICDE)*, pages 1902–1905,  
606 2020.
- 607 [84] R. Pruim, D. Kaplan, and N. Horton. *mosaicData: project MOSAIC Data Sets*, 2020. URL  
608 <https://CRAN.R-project.org/package=mosaicData>.
- 609 [85] R. J. Hyndman. *fpp2: data for "Forecasting: Principles and Practice" (2nd Edition)*, 2018.  
610 URL <https://CRAN.R-project.org/package=fpp2>.
